1 **Low grade inflammation in the epileptic hippocampus contrasts with explosive**  
2 **inflammation occurring in the acute phase following *status epilepticus* in rats:**  
3 **translation to patients with epilepsy**

4

5 Nadia Gasmi<sup>1,2</sup>, Fabrice P. Navarro<sup>1,3</sup>, Michaël Ogier<sup>4</sup>, Amor Belmeguenai<sup>1,2</sup>, Thomas  
6 Lieutaud<sup>1,2</sup>, Béatrice Georges<sup>1,2</sup>, Jacques Bodennec<sup>1,2</sup>, Marc Guénot<sup>5,6</sup>, Nathalie  
7 Streichenberger<sup>6,7</sup>, Philippe Ryvlin<sup>2,8</sup>, Sylvain Rheims<sup>1,2,6</sup>, Laurent Bezin<sup>1,2</sup>

8

9 <sup>1</sup> Lyon Neuroscience Research Center, CNRS UMR5292, Inserm U1028, Lyon 1 University, TIGER team,  
10 Lyon, France

11 <sup>2</sup> Epilepsy Institute, Bron, France

12 <sup>3</sup> CEA, LETI, Division of technologies for healthcare and biology, MINATEC Campus, Grenoble, France

13 <sup>4</sup> Institut de Recherche Biomédicale des Armées, Brétigny-sur-Orge, France

14 <sup>5</sup> Lyon Neuroscience Research Center, CNRS UMR5292, Inserm U1028, Lyon 1 University, Neuropain  
15 team, Lyon, France

16 <sup>6</sup> Department of Functional Neurology and Epileptology, Hospices Civils de Lyon, University of Lyon,  
17 Lyon, France

18 <sup>7</sup> Institut NeuroMyogène, Lyon 1 University, CNRS UMR 5310, INSERM U1217, Lyon, France

19 <sup>8</sup> Department of Clinical Neurosciences, Centre Hospitalier Universitaire Vaudois, Université de  
20 Lausanne, Lausanne, Switzerland.

21

22 Corresponding author:

23 Laurent Bezin, CRNL UMR5292 U1028, Institut des Epilepsies IDEE, 59 boulevard Pinel, F-69500 Bron,  
24 France; [laurent.bezin@univ-lyon1.fr](mailto:laurent.bezin@univ-lyon1.fr).

25

26 Number of figures, 13; Number of tables, 4

27 Supplementary material: Number of figures, 7; Number of tables, 4

## 28 **ABSTRACT**

29 There is still a lack of robust data, acquired identically and reliably from tissues either surgically  
30 resected from patients with mesial temporal lobe epilepsy (mTLE) or collected in animal  
31 models, to answer the question of whether the degree of inflammation of the hippocampus  
32 differs between mTLE patients, and between epilepsy and epileptogenesis. Here, using highly  
33 calibrated RTqPCR, we show that neuroinflammatory marker expression was highly variable  
34 in the hippocampus and the amygdala of mTLE patients. This variability was not associated  
35 with gender, age, duration of epilepsy, seizure frequency, and anti-seizure drug treatments.  
36 In addition, it did not correlate between the two structures and was reduced when the  
37 inflammatory status was averaged between the two structures. We also show that brain tissue  
38 not frozen within minutes after resection had significantly decreased housekeeping gene  
39 transcript levels, precluding the possibility of using post-mortem tissues to assess  
40 physiological baseline transcript levels in the hippocampus. We thus used rat models of mTLE,  
41 induced by status epilepticus (SE), that have the advantage of providing access to physiological  
42 baseline values. They indisputably indicated that inflammation measured during the chronic  
43 phase of epilepsy was much lower than the explosive inflammation occurring after SE, and  
44 was only detected when epilepsy was associated with massive neurodegeneration and gliosis.  
45 Comparison between the inter-individual variability measured in patients and that established  
46 in all epileptic and control rats suggests that some mTLE patients may have very low  
47 inflammation in the hippocampus, close to control values. However, the observation of  
48 elevated inflammation in the amygdala of some patients indicates that inflammation should  
49 be studied not only at the epileptic hippocampus, but also in the associated brain structures  
50 in order to have a more integrated view of the degree of inflammation present in brain  
51 networks involved in mesial temporal lobe epilepsy.

52

53

54 **Keywords:** neuroinflammation, hippocampus, epilepsy, epileptogenesis, human, animals

## 55 1 | INTRODUCTION

56 Considerable research attention has been directed towards a role for neuroinflammation as  
57 one of the primary drivers of epileptogenesis occurring after brain insults and as a self-  
58 perpetuating factor of epileptic seizure activity [24, 35, 42, 46, 48, 49]. Elevated  
59 concentrations of inflammatory markers, e.g. pro-inflammatory cytokines IL1 $\beta$ , IL6 and TNF  
60 and chemokines, have been measured in cerebrospinal fluid and serum of patients that  
61 suffered various epileptogenic brain insults [22], but also in different forms of epilepsy [27,  
62 52]. Access to surgically resected tissue in mTLE patients allowed evaluation of inflammatory  
63 status within the epileptic focus. Studies in human brain tissue evaluated the expression levels  
64 of certain inflammation markers in resected hippocampus of mTLE patients [22, 23, 52]. They  
65 all revealed a particularly high pro-inflammatory state in the hippocampus of mTLE patients.  
66 However, all these studies, even if they present comparisons with non-epileptic tissue, suffer  
67 from the absence of control tissues collected under conditions similar to those of operated  
68 mTLE patients. Control tissues are often autopsy specimen from people with no history of  
69 epilepsy or brain-related disease and who died without associated brain damage.  
70 Furthermore, when mentioned, sampling times range from 4 to 20.5 hours post-mortem,  
71 which is significantly longer than surgical collection of tissue from mTLE patients, with samples  
72 usually managed immediately, either by freezing [2, 10, 21, 31, 41] or by fixation [2, 10, 15,  
73 23, 36, 40].

74 In the large number of studies that have been carried out over the past 2 decades, the  
75 gene markers of inflammation were measured at the level of mRNAs or proteins, by methods  
76 today recognized as very little, if at all, quantitative. Only two studies have recently reported  
77 the quantitative evaluation of some inflammatory markers from early epileptogenesis to  
78 epilepsy onset in rodent models of epilepsy [7, 18].

79 In our study, after demonstrating that mRNAs of three housekeeping genes were  
80 rapidly degraded in the minutes / hours following the surgical resection of the hippocampus  
81 when the resected tissues were not immediately frozen in liquid nitrogen, the first objective  
82 was to evaluate, using calibrated reverse transcription and quantitative PCR, the dispersion of  
83 the mRNA levels of prototypical inflammatory markers measured in 22 patients with drug-  
84 resistant mesial temporal lobe epilepsy who underwent epilepsy surgery, including resection

85 of the hippocampus and the amygdala. Then, in the absence of appropriate human control  
86 tissue, we modeled mTLE in rats, which allowed us to assess not only the physiological baseline  
87 levels of inflammatory markers in the hippocampus, but also the time course of the  
88 inflammatory response during epileptogenesis and in the long term after the onset of epilepsy.  
89 Quantitative RNAscope *in situ* hybridization studies have been performed to identify cells that  
90 express IL1 $\beta$  gene throughout this time course.

## 91 **2 | MATERIAL AND METHODS**

### 92 **Study Design**

93 **Study 1.** Impact of delayed cryopreservation in the processing of human brain samples on  
94 mRNA levels of housekeeping genes (HSKG) determined by RT-qPCR. Three consecutive  
95 groups have been constituted. In groups #1 (n=13) and #3 (n=9), samples used for RT-qPCR  
96 were immediately frozen in liquid nitrogen after resection. In group #2 (n=10), freezing of the  
97 samples was 45-90 min delayed, as detailed below.

98 **Study 2.** Evaluating transcript levels of inflammatory markers in the resected hippocampus  
99 and amygdala of mTLE patients using RT-qPCR. After quantification of 3 genes unrelated to  
100 the inflammatory cascade in Study 1, the samples of patients included in the group #1 and 3  
101 mentioned just above have been selected (n=22) for this experiment.

102 **Study 3.** Contribution of blood cells contained within capillaries of non-perfused brains to the  
103 levels of inflammatory markers measured in the hippocampus. Status epilepticus (SE) was  
104 induced at postnatal day (P) 42 (P42) by pilocarpine (Pilo-SE), and both rats subjected to SE  
105 and control rats were killed 7 hours after SE. At termination time, brains were collected from  
106 rats that were transcardially perfused with saline (control rats: n=5; SE rats: n=4) or not  
107 (control rats: n=5; SE rats: n=5).

108 **Study 4.** Evaluation of gene expression at transcript level in the rat hippocampus during  
109 epileptogenesis and chronic epilepsy. Pilo-SE was induced in weanlings (W) at P21 or juvenile  
110 (J) rats at P42. Hippocampus of rats were dissected after transcardial perfusion of NaCl and  
111 the inflammatory profile was evaluated by RT-qPCR. Analysis was performed in rats sacrificed  
112 at different time points after SE: during epileptogenesis, that is at 7 hours (W, n=7 ; J, n=6), 1  
113 day (W, n=8; J, n= 6), 9 days (W, n=10 ; J, n=7) post-SE, and once chronic epilepsy was

114 developed in all rats, i.e. 7 weeks post-SE (W, n=8 ; J, n=8). Brains of control rats were also  
115 collected; however, to reduce the number of animals used, some time points have been  
116 pooled: W rats (7h, 1 day and 9 days: n=10 ; 7 weeks: n=6) and J rats (7h and 1-9 days: n=6 ; 7  
117 weeks: n=6).

118 **Study 5.** Astroglial and microglial activations evaluated using GFAP- and ITGAM-  
119 immunofluorescent detections, respectively, in the rat hippocampus at 1 day (W, n=4 ; J, n=5),  
120 9 days (W, n=6 ; J, n=7) and 7 weeks post-SE (W, n=6 ; J, n=7), induced in W and J rats, and in  
121 respective controls (W, n=3 for 1-9 days, n=5 for 7 weeks; J, n=5 for both 1-9 days and 7  
122 weeks).

123 **Study 6.** Distribution and quantitation of IL-1 $\beta$  transcript were evaluated using RNAscope®-  
124 based quantitative *in situ* hybridization in the hippocampus of 5 patients with mTLE (3 with  
125 high and 2 with low tissue levels of IL-1 $\beta$  mRNA determined by RT-qPCR) and of rats subjected  
126 to Pilo-SE at P42 and sacrificed 7 hours (n=3), 1 day (n=5), 9 days (n=3) and 7 weeks (n=3) post-  
127 SE and in respective controls (7h and 1-9 days: n=2; 7 weeks: n=2).

## 128 **Patients**

129 Human brain tissues were obtained from 32 patients with drug-resistant mesial temporal lobe  
130 epilepsy (mTLE) who underwent anterior temporal lobectomy at the Epilepsy Department of  
131 the Lyon's University Hospital, France, between 2009 and 2012. Evaluation of eligibility for  
132 epilepsy surgery, including presurgical work-up, was performed as described elsewhere [38].  
133 Pre-operative written informed consent was obtained from all patients for the use of resected  
134 brain tissue for research purpose.

135 The first group of patients included 6 men (15-56 years) and 7 women (15-51 years); the  
136 second included 7 men (19-50 years) and 3 women (17-37 years); the third included 4 men  
137 (14-49 years) and 5 women (12-42 years). The detailed clinical data of each patient are listed  
138 in Table 1.

139 **Collection of surgical specimen.** Hippocampi and amygdala were resected *en bloc* by the  
140 neurosurgeon (MG) and immediately given to an investigator in charge of preparation of the  
141 specimen in the operating room. They were rinsed for 1 min in ice-cold saline and cut in 3  
142 equal parts (for the hippocampi, cuts were performed perpendicularly to the longitudinal axis

143 from the head to the body): the first part was immediately frozen in liquid nitrogen for 22  
144 samples and then stored at -80°C or immersed into an ice-cold RNAlater® solution for 45 to 90  
145 min before freezing in liquid nitrogen; the second part was fixed for 72 hours in an ice-cold 4%  
146 paraformaldehyde solution, immediately after resection (n=22) or after a 45-90 min delay  
147 (n=10), cryoprotected into an ice-cold 30% sucrose solution prepared in 0.1M phosphate  
148 buffer, frozen at -40°C in isopentane and then stored at -80°C; and the third part was used for  
149 routine histopathological evaluation.

## 150 **Animals**

151 All animal procedures were in compliance with the guidelines of the European Union (directive  
152 2010-63), taken in the French law (decree 2013/118) regulating animal experimentation, and  
153 have been approved by the ethical committee of the Claude Bernard Lyon 1 University  
154 (protocol # BH-2008-11). We used a tissue collection bank generated by TIGER team in 2009-  
155 2012. Briefly, male Sprague-Dawley rats (Harlan/Envigo, The Netherlands) were used in these  
156 experiments. They were housed in a temperature-controlled room ( $23 \pm 1^\circ\text{C}$ ) under diurnal  
157 lighting conditions (lights on from 6 a.m to 6 p.m). Pups arrived at 15 day-old and were  
158 maintained in groups of 10 with their foster mother until P21. Beyond that age, rats were  
159 maintained in groups of 5 in 1,800 cm<sup>2</sup> plastic cages, with free access to food and water. After  
160 SE, rats were weighed daily until they gained weight.

161 **Pilocarpine-induced *status epilepticus* (SE).** SE was induced by pilocarpine, injected at day 21  
162 or 42. To prevent peripheral cholinergic side effects, scopolamine methylnitrate (1 mg/kg in  
163 saline, s.c.; Sigma-Aldrich) was administered 30 min before pilocarpine hydrochloride (25  
164 mg/kg at P21 and 350 mg/kg at P42, in saline, i.p.; Sigma-Aldrich). For P21 rat pups, lithium  
165 chloride (127 mg/kg in saline, i.p.; Sigma-Aldrich) was injected 18 hours before scopolamine.  
166 After 30 min of continuous behavioral SE at P21 and 2 hours at P42, 10 mg/kg diazepam (i.p.;  
167 Valium; Roche®) was injected, followed, 90 min later for P21 and 60 min later for P42, by a  
168 second injection of 5 mg/kg diazepam to terminate behavioral seizures. Control rats received  
169 systematically equivalent volumes of saline solution. The animals were then sacrificed at  
170 various time points: 7 hours, 1 day, 9 days and 7 weeks after SE.

171 **Animal care after Pilo-SE.** Control and treated rats were weighted every day during the first  
172 two weeks following Pilo-SE, and then every week until termination of the experiment. Daily

173 abdominal massages were performed twice a day during the first week to activate intestinal  
174 motility, which was disrupted following Pilo-SE.

175 **Detection of spontaneous recurrent seizures (SRS).** Electroencephalographic recordings were  
176 excluded to determine epilepsy onset due to pilot experiments that showed that the sole  
177 implantation of screws into the skull induced significant and lasting inflammation over time in  
178 the cortex and, to a lesser extent, in the hippocampus. As a result, epilepsy onset was  
179 determined according to clinical criteria.

180 As previously reported [12, 25], development of a chronic epileptic state, i.e. with SRS, was  
181 confirmed in all rats subjected to Pilo-SE at P42 by the end of the 2<sup>nd</sup> week post-SE. However,  
182 there is an inconsistency in the literature about the proportion of rats that develop SRS and  
183 the time of SRS onset when Pilo-SE is induced at P21 in Sprague-Dawley rats [12, 32]. We thus  
184 induced Pilo-SE in a group of 7 male rats at P21 and determined whether they developed SRS  
185 by the 7<sup>th</sup> week post-SE, using a video-EEG monitoring performed 2-3 days a week, for 24  
186 consecutive hours each time, from the 4<sup>th</sup> to the 7<sup>th</sup> week post-SE. When rats were placed in  
187 their recording cage, they were each time subjected to a handling-induced seizure (HIS) test,  
188 which consisted in restraining rats for 10 seconds at the level of the chest with gentle pressure.  
189 During the 3<sup>rd</sup> week post-SE, rats were implanted under 3% isoflurane anesthesia with three  
190 screw electrodes positioned over the frontal and parietal cortices, and over the cerebellum  
191 used as ground electrode. Electrodes were connected to a multipin socket and secured to the  
192 skull using a thin layer of dental adhesive (Super-Bond C&B) and acrylic dental cement. One  
193 week after surgery, rats started to be connected to the video-EEG setup. All rats had  
194 developed HIS by the end of the 5<sup>th</sup> week post-SE and all had SRS at the end of the 6<sup>th</sup> week  
195 post-SE. During the 7<sup>th</sup> week post-SE, the average number of seizures was  $1.1 \pm 0.3$  seizure/day  
196 ( $n=7$ ). Based on this result, for rats subjected to Pilo-SE and used for inflammation analysis,  
197 epilepsy development was monitored by testing the occurrence of HIS three times a day from  
198 the 5<sup>th</sup> week post-SE. Once HIS were developed on 2 consecutive trials, rats were observed by  
199 experimenters for 5 consecutive hours (between 01:00 and 06:00 p.m) over the following days  
200 to detect the presence or absence of SRS. All rats were declared as “epileptic” (EPI) by the end  
201 of the 6<sup>th</sup> week post-SE.

202

## 203 **Ex Vivo Procedures**

204 All rats were deeply anesthetized with a lethal dose of pentobarbital (100 mg/kg; Dolethal)  
205 before being sacrificed. All rats were transcardially perfused with sodium chloride (NaCl 0.9%)  
206 for 3 min at 30 mL/min. For RT-qPCR analysis, hippocampus were rapidly microdissected,  
207 frozen in liquid nitrogen, and stored at -80°C. For immunochemistry analysis, animals were  
208 transcardially perfused (30 mL/min) with 4% paraformaldehyde in 0.1 M phosphate buffer.  
209 After cryoprotection in 30% sucrose, brains were frozen at -40°C in isopentane and stored at  
210 -80°C.

211 **RNA extraction and quantification of transcript level variations by reverse transcriptase real-**  
212 **time polymerase chain reaction (RT-qPCR).** Brain structures frozen in liquid nitrogen were  
213 crushed using Tissue-Lyser (Qiagen®) in 250 µL of ultrapure RNase-free water (Eurobio).  
214 Nucleic acids were extracted by adding 750 µL Tri-Reagent LS (TS120, Euromedex) and 200 µL  
215 chloroform (VWR®). After precipitation with isopropanol (I-9516, Sigma-Aldrich®), washing in  
216 75% ethanol (VWR) and drying, total nucleic acids were resuspended in 50 µL ultrapure water  
217 and treated with DNase I (Turbo DNA Free® kit; AM1907, Ambion®) to eliminate any trace of  
218 possible genomic DNA contamination. The purified total RNAs were then washed using the  
219 RNeasy® minikit (Qiagen®) kit. After elution, the total RNA concentration was determined for  
220 each sample on BioDrop® µLite. The quality of total RNAs was verified on microgel chips using  
221 LabChip® 90 (Caliper), which provides an RNA Integrity Number (RIN) value by analyzing the  
222 integrity of two ribosomal RNAs (18S and 28S) predominantly present in all tissue RNA  
223 extracts. All selected samples had a RIN value greater than 7.0, and were stored at -80°C until  
224 use. Total tissue RNAs (480 ng) were reverse transcribed to complementary DNA (cDNA) using  
225 both oligo dT and random primers with PrimeScript RT Reagent Kit (Takara) according to  
226 manufacturer's instructions, in a total volume of 10 µL. In RT reaction, 300 000 copies of a  
227 synthetic external non-homologous poly(A) standard messenger RNA (SmRNA; [1], patent  
228 WO2004.092414) were added to normalize the RT step [39]. cDNA was diluted 1:13 with  
229 nuclease free Eurobio water and stored at -20°C until further use. Each cDNA of interest was  
230 amplified using 5 µL of the diluted RT reaction by the "real-time" quantitative polymerase  
231 chain reaction (PCR) technique, using the Rotor-Gene Q thermocycler (Qiagen®), the SYBR  
232 Green Rotor-Gene PCR kit (Qiagen®) and oligonucleotide primers specific to the targeted  
233 cDNA. The sequences of the specific forward and reverse primer pairs were constructed using



234 the Primer-BLAST tool or using the "Universal Probe Library" software (Roche Diagnostics).  
235 Sequences of the different primer pairs used are listed in Supplementary Table S1 for humans  
236 and Supplementary Table S2 for rats. The number of copies of each targeted cDNA contained  
237 in 5  $\mu$ L of the diluted RT reaction was quantified using a calibration curve based on cascade  
238 dilutions of a solution containing a known number of cDNA copies.

239 Pro-inflammatory (PI-I), anti-inflammatory (AI-I), inflammation cell (IC-I) and housekeeping  
240 gene (HSKG-I) indexes were calculated for each series of individuals to be compared using a  
241 specific set of genes: IL1 $\beta$ , IL6, TNF, MCP1 and MIP1 $\alpha$  for PI-I; IL4, IL10 and IL13 for AI-I; ITGAM  
242 and GFAP for IC-I; DMD, HPRT1 and GAPDH for HSKG-I. For each individual, the number of  
243 copies of each transcript has been expressed in percent of the averaged number of copies  
244 measured in the whole considered population of individuals. Once each transcript is expressed  
245 in percent, an index is calculated by adding the percent of each transcript involved in the  
246 composition of the index and expressed in arbitrary units (A.U.). Each time that an index is  
247 presented, the groups of individuals constituting the population is specified.

$$248 \quad \text{Gene-index}_{(\text{PI-I, AI-I, IC-I, HSKG-I})} = \sum_{k=1}^n \frac{(\text{cDNA copy nbr for gene}_{(k)}) \text{ in individual A} \times 100}{\text{average cDNA copy nbr for gene}_{(k)} \text{ in all individuals compared}}$$

249 **Tissue processing for histological procedures.** Cryostat-cut (40  $\mu$ m thick) sections from mTLE  
250 patient tissue samples or from rat samples were transferred into a cryopreservative solution  
251 composed of 19.5 mM NaH<sub>2</sub>PO<sub>4</sub>.2H<sub>2</sub>O, 19.2 mM NaOH, 30% (v/v) glycerol and 30% (v/v)  
252 ethyleneglycol and stored at -25°C.

253 **Immunohistochemistry.** For immunohistofluorescent detections, free-floating sections (40  
254  $\mu$ m thick) from paraformaldehyde-fixed tissue were incubated with a rabbit polyclonal anti-  
255 GFAP antibody (1:1,000; AB5804, Chemicon) to label astrocytes, a mouse monoclonal anti-  
256 ITGAM antibody (1:1,000; CBL1512Z, Chemicon) to detect microglia and immunocompetent  
257 cells, a goat polyclonal anti-CD14 antibody (1:1,000; sc-5749, Santa-Cruz) to detect  
258 monocytes, a mouse monoclonal anti-NeuN antibody (1:1,000; MAB-377, Chemicon) to label  
259 neurons, and finally rabbit polyclonal anti-IL1 $\beta$  antibody (1:200; #250716, Abbiotec). Some  
260 sections were also incubated with a combination of a mouse monoclonal anti-GFAP antibody  
261 (1:1,000; G3893, Sigma-Aldrich) and the above-described polyclonal anti-GFAP antibody to  
262 verify whether both antibodies provided similar detections of GFAP protein. Fluorescent

263 secondary antibodies (Alexa-Fluor-conjugated antibodies; Molecular Probes) used were:  
264 A488-donkey anti-rabbit IgG antibody (1:1,000; A-21206), A647-donkey anti-mouse IgG  
265 antibody (1:1,000; A-31571), A633-goat anti-mouse IgG antibody (1:500; A-21052), A633-  
266 donkey anti-goat IgG antibody (1:1,000; A-21082). Sections were then mounted on SuperFrost  
267 Plus slides and coverglassed with Prolong Diamond Antifade reagent (Molecular Probes). Dual-  
268 immunolabelings of GFAP and ITGAM were observed using a Carl Zeiss Axio Scan.Z1 Digital  
269 Slide Scanner with a resolution of x40. Dual-immunolabelings of GFAP, and single  
270 immunolabeling of either NeuN or IL1 $\beta$  were observed using a LSM800 confocal microscopy  
271 system (Zeiss) with ZEN imaging software (Zeiss). Images were then imported into Adobe  
272 Photoshop CS6 13.0 (Adobe Systems) for further editing. All sections were analyzed under  
273 identical conditions of photomultiplier gain, offset and pinhole aperture, allowing the  
274 comparison of fluorescence intensity between regions of interest. For NeuN, ImageJ software  
275 was used to measure surface areas of fluorescence using thresholding procedures. The  
276 quantification of the immunofluorescent surface area was performed on stacks of 12 images  
277 taken over a thickness of 11.36  $\mu\text{m}$  with a step of 1.03  $\mu\text{m}$ . For colorimetric  
278 immunohistodetection of NeuN, free-floating sections were sequentially incubated with the  
279 mouse monoclonal anti-NeuN antibody (1:1,000; MAB-377, Chemicon), and with a  
280 biotinylated donkey anti-mouse IgG (1:1,000; Jackson Immuno Research, 715-065-151), and  
281 revealed by the Avid-Biotin Complex (ABC)-peroxydase (1:1,000; Vector, PK-6100) in presence  
282 of DAB.

283 ***In Situ* Hybridization using RNAscope<sup>®</sup>.** Probes were designed by ACD (Advanced Cell  
284 Diagnostics, Newark, New Jersey) to hybridize to IL1 $\beta$ , ITGAM and GFAP mRNA molecules with  
285 species specificity (*Homo sapiens* -Hs- probes for humans; *Rattus Norvegicus* -Rn- for rats).  
286 The RNAscope<sup>®</sup> Multiplex Fluorescent Reagent Kit v2 (Cat. 323100) and the hybridization oven  
287 (HybEZ Oven) were also obtained from ACD. The RNAscope<sup>®</sup> assay was performed as  
288 described by the supplier. Briefly, the staining protocol included five steps: pretreatment with  
289 protease, hybridization of target probes, amplification of the signal, detection of the signal  
290 and mounting of the slides.

291 Selected tissue sections of resected hippocampus from mTLE patients or selected rat tissue  
292 section including the hippocampus were removed from cryoprotectant solution and rinsed in  
293 phosphate-buffered saline (PBS) three times. RNAscope<sup>®</sup> assays were performed on tissue

294 mounted on SuperFrost slides. Sections went through treatment with Protease III solution  
295 during 30 minutes at 40°C. Three different probes were then used to localize mRNAs of IL1 $\beta$   
296 (Hs-IL1 $\beta$ , Cat. 310361; Rn-IL1 $\beta$ , Cat. 314011), ITGAM (Hs-ITGAM, Cat. 555091-C3; Rn-ITGAM,  
297 Cat. 300031-C3) and GFAP (Hs-GFAP, Cat. 311801-C2; Rn-GFAP, Cat. 407881-C2). Sections  
298 subsequently passed through amplification steps followed by fluorescent labeling in Opal 520,  
299 Opal 570 and Opal 690 (NEL810001KT, PerkinElmer) at 1:1000 dilution with amplification  
300 diluent. Sections were then counterstained with DAPI and coverglassed with Prolong Diamond  
301 Antifade reagent (Molecular Probes). Slides were observed using a TCS SP5X confocal  
302 microscopy system (Leica). All sections were analyzed under identical conditions of  
303 photomultiplier gain, offset and pinhole aperture, allowing the comparison of fluorescence  
304 intensity between regions of interest. Then, for each of the hybridized probe, ImageJ software  
305 was used to measure areas of fluorescence using thresholding procedure.

### 306 **Data and statistical analysis.**

307 GraphPad Prism (v.7) software was used to statistically analyze data. Majority of data are  
308 expressed as mean  $\pm$  SEM of the different variables analyzed. Transcript levels are also  
309 expressed using box-and-whisker plots to illustrate the distribution of the considered cohort.  
310 Statistical significance for within-group comparisons was calculated by one-way or two-way  
311 analysis of variance (ANOVA) with Bonferroni or Tukey's *post hoc* test. The p value of 0.05  
312 defined the significance cut-off. Correlations were assessed using Spearman's rank correlation  
313 test.

## 314 **3 | RESULTS**

### 315 **Human brain tissues with delayed cryopreservation are not suitable controls for** 316 **transcriptomic studies**

317 The main clinical characteristics of the 32 patients included in the study are summarized in  
318 Table 1. Ideally, surgically resected brain tissues should be frozen at a very low temperature  
319 immediately after collection, so as to preserve the molecules to be measured. These  
320 conditions were those observed for Patient Groups 1 and 3 (G1 and G3), whose resected brain  
321 tissues were frozen less than 5 minutes after neurosurgical removal. For logistic reasons, it  
322 was temporarily decided to delay the freezing procedure of the resected tissues from Patient  
323 Group 2 (G2). To this end, tissues were transferred into ice-cold RNALater<sup>®</sup> immediately after

324 their resection, then given to the research staff in charge of freezing them in liquid nitrogen  
325 back to the laboratory within a time interval ranging between 45 and 90 minutes. RNeasy<sup>®</sup>  
326 has been developed to preserve RNA integrity even if samples are stored for days to weeks at  
327 4°C after collection either before freezing or direct extraction of total RNAs [17]. We first  
328 compared the mRNA levels of three housekeeping genes (HSKG = GAPDH, HPRT1 and DMD)  
329 between G1 (P01-P17, n=13) and G2 (P18-P29, n=10). To ensure mRNA quantification  
330 independent of any internal control (i.e. by a so-called invariant gene), we used an external  
331 standard mRNA (the SmRNA patented by our group) [1].

332 A very large decrease was observed in G2 (7.2-fold less than G1 for DMD: p=0.0022;  
333 4.7-fold less than G1 for GAPDH: p=0.0371; 14-fold less than G1 for HPRT1: p=0.0008, Fig. S1).  
334 By switching back to the first freezing protocol (i.e. freezing immediately after resection) for  
335 G3 (P40-P49, n=9), the average values for the 3 housekeeping genes were closer to that  
336 obtained for G1 (Fig. 1). Significant differences were observed between G1 and G3 for GAPDH  
337 and HPRT1 transcripts. Although one can only speculate at this point on the interpretation of  
338 this result, one explanation could be that the transcript levels of these genes are so variable  
339 from one patient to another that it may be that when these patients are randomly assigned  
340 between two groups, these differences become significant. All of the samples used in this  
341 study had RIN values >7, attesting that all RNA samples were of excellent quality, according to  
342 the integrity of 18S and 28S ribosomal RNAs. Overall, these results indicate that delayed  
343 cryopreservation protocol caused alteration of the transcript levels in human resected  
344 hippocampi, precluding the use of autopsy/post-mortem tissue as valid controls, in particular  
345 to determine reference / basal levels of neuroinflammatory markers. For the rest of the study,  
346 values of patient group 2 were excluded.

### 347 **Inflammation in the hippocampus of mTLE patients is highly variable**

348 Twenty-two fresh frozen surgically resected hippocampi of mTLE patients (P01-P17 and P40-  
349 49 from G1 and G3; 12F, 10M,  $31 \pm 14$  years) were subjected to gene-specific transcript  
350 quantification for a set of 11 inflammatory markers including pro-inflammatory (IL1 $\beta$ , IL6, TNF,  
351 IFN $\gamma$ ) and anti-inflammatory (IL4, IL10, IL13) cytokines, chemokines (MCP1, MIP1 $\alpha$ ) and cell  
352 markers (microglia/macrophages: ITGAM, astrocytes: GFAP). In our relatively small-scale gene  
353 expression analysis study, we measured transcripts by calibrated RT and qPCR rather than the  
354 corresponding proteins by immunohistofluorescence, western blot or Elisa, for example.

355 Indeed, the latter methods depend on the ability of the antibodies used to recognize the  
356 targeted proteins, which may not be equivalent and thus generate interpretation biases, as  
357 shown by the detection of the GFAP protein on brain sections using two antibodies directed  
358 against the same protein (Fig. S1). For each patient, all the above-mentioned gene transcripts  
359 could be detected and then quantified, except those of IFN $\gamma$ , IL4 and IL13 that were not  
360 detected in any of the 22 samples, even when using several primer pairs designed in different  
361 parts of the corresponding cDNAs. Individual cDNA value for each marker was expressed in  
362 percent of the calculated average (n=22) value (Fig. 2). IL6 and MCP1 had the highest and  
363 lowest interindividual variability, respectively.

364 Not all the lowest values are observed in the same patient, nor are the highest values  
365 (Table 2). For example, patient P41 who had the lowest values for TNF, MCP1 and MIP1 $\alpha$  did  
366 not have the lowest values for IL1 $\beta$  and IL6. Similarly, patient P49, who had the highest values  
367 for TNF and IL6, did not have the highest values for IL1 $\beta$ , MCP1 and MIP1 $\alpha$  (Tables 2 and S3).  
368 Therefore, to provide a general overview of the inflammatory status for each patient, we  
369 calculated a pro-inflammatory index (PI-I) and an inflammation cell index (IC-I) that integrate  
370 for each patient the average normalized expression of each individual cytokine/chemokine or  
371 each individual cell marker, respectively. Patients P41 and P49 had the lowest (56 A.U.) and  
372 the greatest (1,730 A.U.) pro-inflammatory index, respectively (Fig. 2A-B), corresponding to a  
373 ~31-fold difference. It is to note that the pro-inflammatory index correlated with the  
374 inflammation cell index ( $IC-I = 0.195 \times PI-I + 102.2$ ;  $p < 0.0023$ ).

375 It is to note that the levels of the anti-inflammatory cytokine IL10 correlated with the pro-  
376 inflammatory index ( $PI-I = 3.015 (IL10 \text{ level}) + 198$ ;  $p < 0.0004$ ), suggesting that pro- and anti-  
377 inflammatory processes are subjected to a coordinate regulation in the hippocampus of mTLE  
378 patients.

379 To our knowledge, in order to normalize RT-PCR data, all prior studies used one or a  
380 combination of housekeeping genes considered as invariant between samples. We previously  
381 stressed the fact that high variability was also found in housekeeping genes (Fig. 1). We  
382 calculated a housekeeping gene index integrating DMD, GAPDH and HPRT1, which confirmed  
383 the high variability in the pool of the three housekeeping genes between patients, e.g. a 22-  
384 fold difference between patients 5 and 42 (Fig. S2A). We show that the housekeeping gene  
385 variability did not fit with that of the pro-inflammatory index (Fig. 3A and Fig. S2A). Hence, if

386 housekeeping genes had been used to normalize the RT reaction, this would have led to biased  
387 results (Fig. S3A).

388 We next investigated whether the variation of the pro-inflammatory index was  
389 associated with relevant clinical features. The six patients with the greatest pro-inflammatory  
390 index (P07, P10, P13, P42, P44, P49) all had neuronal loss (Table 1), but neuronal loss was not  
391 systematically associated with a high pro-inflammatory and inflammation cell index values (PI-  
392 I =  $106.8 \times [\text{neuronal loss score}] + 27$ ;  $p=0.31$  and IC-I =  $29.02 \times [\text{neuronal loss score}] + 137.7$ ;  
393  $p=0.39$ ).

394 The pro-inflammatory index (PI-I, in A.U.) did not correlate either with the age (in year)  
395 at epilepsy onset (PI-I =  $14.95 \times \text{age} + 342.3$ ;  $r^2=0.11939$ ) nor with the duration (in year) of  
396 epilepsy (PI-I =  $-0.017 \times \text{duration} + 503.5$ ;  $r^2 = 0.00002$ ). While reports on seizure frequency  
397 before surgery were lacking for most patients, data available for 5/22 patients provide  
398 indication that rare seizures (P07, 1 seizure per month) and frequent seizures (P15, 2 seizures  
399 per week) were associated with high (1,132 A.U.) and low (228 A.U.) pro-inflammatory index  
400 values, respectively. Finally, the extent of the pro-inflammatory and inflammation cell indexes  
401 were not associated with any given anti-epileptic drug treatment (compare Table 1 and Fig.  
402 3A-B).

403 Overall, our results show that some, but not all patients with refractory mTLE, had a  
404 substantial level of inflammation within the resected hippocampus. At this stage, the absence  
405 of appropriate human control tissues, as this is the case in some studies [2, 7, 33], did not  
406 allow us to know if the inflammation observed was at low or very high level. In order to provide  
407 answers to this question, the rest of this study was conducted on preclinical models in order  
408 to have access to valid control tissues and to compare the inflammatory level during chronic  
409 epilepsy to that reported during epileptogenesis [7, 18, 46].

#### 410 **Circulating inflammatory markers do not contribute significantly to the quantitation** 411 **performed in whole brain extracts**

412 Resected hippocampi from patients with mTLE contain blood tissue; it was thus essential to  
413 ascertain whether the presence of blood could be a hindrance to the evaluation of brain  
414 parenchyma inflammatory status. We used rats subjected to pilocarpine-induced *status*  
415 *epilepticus* (SE) to evaluate the potential contribution of blood into the measures performed  
416 in brain tissue. Transcripts levels of IL1 $\beta$ , IL6, TNF, MCP1, MIP1 $\alpha$  and ITGAM were compared

417 between rats devoid of blood tissue following transcardial perfusion of sodium chloride and  
418 rats that were not subjected to perfusion (Table 3). The study was conducted in juvenile rats  
419 7h after SE induction (perfused rats: SE-NaCl; not perfused: SE-blood) and in their respective  
420 controls (perfused rats: CTRL-NaCl; not perfused rats: CTRL-blood). Results are expressed as  
421 the percentage of the mean transcript level value measured in CTRL-NaCl group. Except for  
422 TNF, where a significant difference is observed between the two groups of controls ( $p < 0.01$ ),  
423 the inflammatory expression profiles are identical with or without transcardial perfusion of  
424 NaCl, showing that the level of inflammatory molecules into brain vessels remains marginal,  
425 indicating that most inflammatory molecules measured in whole brain extracts originated  
426 more from brain parenchyma than blood.

#### 427 **Model-specific differences in post-SE microgliosis and astrogliosis**

428 All but one patient with mTLE demonstrated with hippocampal sclerosis on pathological  
429 examination and among them, the extent of neuronal loss and reactive gliosis was highly  
430 variable (Table 1). Therefore, to model the heterogeneity of patients with mTLE, we used two  
431 well-known rat models presenting various extents of neuronal degeneration. The first model  
432 used consisted of juvenile P42 rats subjected to pilocarpine-induced SE (Pilo-SE), characterized  
433 by extensive neuronal degeneration in the hippocampus, the piriform cortex, the amygdala  
434 and the insular agranular cortex [29, 39, 51]. By contrast, the second model used consisted of  
435 weaned P21 rats subjected to lithium-Pilo-SE, characterized by minimal or not detectable  
436 neuronal loss at 15 days post-SE or once adults [8, 9], as illustrated (Fig. 4).

437 In these two models, characterization of SE-induced reactive gliosis in the rat  
438 hippocampus was performed histologically during epileptogenesis (1 day and 9 days post-SE)  
439 and during the chronic phase of epilepsy (7 weeks post-SE), by double-labeling  
440 immunofluorescence targeting GFAP and ITGAM (CD11b) to evaluate astroglial and  
441 microglial/macrophage reactivity, respectively (Fig. S4). Before induction of SE, astrocytes and  
442 microglia showed low GFAP and ITGAM signal, respectively. High reactivity of both GFAP and  
443 ITGAM was observed at 1 day and 9 days post-SE in rats subjected to juvenile SE, and, to a  
444 lesser extent for rats subjected to SE at weaning. These histological results are in line with  
445 those obtained for the corresponding transcripts measured by RT-qPCR, the induction of both  
446 GFAP and ITGAM in the hippocampus of rats subjected to SE at P42 (dark blue bars) being  
447 greater during epileptogenesis to that of rats subjected to SE at P21 (light blue bars) (Fig. 5A-

448 B). In addition, as previously reported in rats following pilocarpine-induced SE [36],  
449 preliminary experiments from our laboratory indicated that ITGAM<sup>+</sup> round-shaped cells  
450 infiltrated the brain parenchyma beyond 7 hours and until 3 days post-SE, their peak being  
451 observed 24 hours post-SE. These cells were identified as extravasating macrophages, as all  
452 round-shaped ITGAM<sup>+</sup> cells in the hippocampus expressed macrophage-specific CD14 marker  
453 (Fig. 6). During the chronic phase of epilepsy, at 7 weeks after SE, GFAP and ITGAM mRNA  
454 levels decreased markedly in the hippocampus, and GFAP transcript remained higher than  
455 controls only in rats subjected to SE at P42 (Fig. 5A-B). When considering the overall markers  
456 of reactive gliosis (GFAP and ITGAM mRNAs), the inflammation cell index was always greater  
457 in rats subjected to SE at P42 compared to P21, both during epileptogenesis and the chronic  
458 phase of epilepsy (Fig. 5C).

#### 459 **Modeling of mTLE in rats suggests that some patients may have basal inflammatory levels** 460 **in the hippocampus**

461 As highlighted above, no control hippocampal tissues collected under similar conditions to  
462 those of mTLE patients were available to compare levels of inflammation measured in the  
463 resected hippocampi of mTLE patients to reference / baseline values. In this context, animal  
464 models of mTLE presented above have provided all their added value in that epileptic rats can  
465 be compared to control rats for which samples were obtained under perfectly identical  
466 conditions and, in addition, very similar to those of surgically resected tissues of mTLE  
467 patients, i.e. with quasi immediate freezing after tissue collection.

468 Transcripts level of the same panel of inflammatory mediators that were studied in  
469 mTLE patients were quantified in the hippocampus of SD rats that developed epilepsy after SE  
470 induced at weaning (EPI-W) or at juvenile stage (EPI-J) Measured values were compared to  
471 that of control rat groups (CTRL) (Fig. 7). The inflammatory levels of control rats (sacrificed at  
472 the same time as the epileptic animals, i.e. 7 weeks post-SE) whose SE was induced at weaning  
473 (CTRL-W) and juvenile (CTRL-J) stages were not statistically different, hence the two control  
474 groups were pooled in a same control group (CTRL). IL6 was not detected in any of the control  
475 rat samples.

476 In EPI-W rats, statistical analyses revealed that, except for IL13 ( $p=0.0384$ ) and GFAP  
477 ( $p=0.0043$ ), there was no significant difference between the dispersion of the CTRL group and  
478 the EPI-W group, indicating that when the SE is induced in weaned rats, the inflammation does



479 not differ substantially from healthy rats. In contrast, in EPI-J, we show a significant difference  
480 between CTRL group and EPI-J group for IL1 $\beta$  ( $p=0.0002$ ), MCP1 ( $p<0.0001$ ), MIP1 $\alpha$  ( $p<0.0001$ ),  
481 IL13 ( $p=0.0234$ ), ITGAM ( $p=0.0039$ ) and GFAP ( $p<0.0001$ ) (Fig. 7). We also demonstrate that  
482 EPI-J group is significantly different from EPI-W group for IL1 $\beta$  ( $p=0.0005$ ), MCP1 ( $p=0.0005$ ),  
483 MIP1 $\alpha$  ( $p<0.0001$ ) and GFAP ( $p=0.0034$ ) (Fig. 7). No differences in expression of TNF, IL4 and  
484 IL10 were found between epileptic groups and control group as well as within epileptic groups.

485 In these two rat models of mTLE, we further investigated *il1 $\beta$*  gene regulation at  
486 protein levels and representative genes of the IL1 system, which is one of the most studied in  
487 the context of neuroinflammation in epilepsy. We tested the hypothesis of whether low levels  
488 of IL1 $\beta$  transcript in EPI-J rats could be due to a greater cytoplasmic pool of the corresponding  
489 protein that may exert a negative control on the transcription of this specific gene. We  
490 detected IL1 $\beta$  protein by immunohistofluorescence 7 weeks post-SE in controls and epileptic  
491 rats in both rat models (Fig. S5A-B). We found that IL1 $\beta$  protein was indisputably detected in  
492 EPI-J rats, whose IL1 $\beta$  transcript levels were significantly stronger than that of controls and of  
493 EPI-W rats (Fig. 7). By contrast, IL1 $\beta$  protein was barely detected in EPI-W rats, ruling out the  
494 hypothesis that low levels of IL1 $\beta$ -mRNA levels in these rats might be due to elevated  
495 cytoplasmic levels of IL1 $\beta$  protein. IL1 $\beta$  signaling depends on its target, interleukin-1 receptor  
496 type 1 (IL1R1) and its naturally occurring competitive IL1 $\beta$  receptor antagonist (IL1RA) [48].  
497 Therefore, we measure transcript levels of these two genes, and found that both IL1R1 (Fig.  
498 S5C) and IL1RA (Fig. S5D) mRNA levels were induced in EPI-J rats compared to controls, but  
499 not in EPI-W rats. All these data support the hypothesis that key representative genes of the  
500 interleukin 1 system are similarly regulated. Although the numerous post-transcriptional  
501 mechanisms involved in the transformation of messenger RNAs into proteins are not yet  
502 sufficiently well defined to be able to predict protein concentrations from mRNA levels, our  
503 results indicate on the one hand that there is a coordinated expression of IL1 $\beta$  mRNA and  
504 protein, and, on the other hand, that genes representative of the interleukin 1 system appear  
505 to be less expressed in EPI-W rats than in EPI-J rats.

506 When considering both PI-I and IC-I, a strong difference was confirmed between the  
507 two models of epilepsy (Fig. 8), highlighting a significant difference between controls and EPI-  
508 W rats for the inflammatory cell index but not for the pro-inflammatory index. On average,  
509 the PI-I and the IC-I increased at most 1.96 times and 1.90 times, respectively, in epileptic rats

510 compared to control rats (Fig. 8). Altogether, our preclinical data indicate that depending on  
511 the epilepsy model used, epilepsy can be associated or not with an induction of pro-  
512 inflammatory cytokines and chemokines (Fig. 8A), but is constantly associated with an  
513 induction of inflammation cell index (Fig. 8B) resulting from an induction of astroglial GFAP  
514 (Fig. 7).

515 In the absence of reference values for samples from mTLE patients, we undertook a  
516 translational approach by facing off the data obtained in rats with those of patients, based on  
517 the dispersion of normalized values obtained for the different inflammatory markers. The total  
518 variability observed in rats, including both the control group and the two epileptic rat groups,  
519 covered between 49% and 93% of the variability observed in patients, with: 76% for IL1 $\beta$ , 49%  
520 for TNF, 93% for MCP1, 87% for MIP1 $\alpha$ , 87% for IL10, 59% for ITGAM, 69% for GFAP (Fig. 7),  
521 50% for the PI-I and 47% for the IC-I (Fig. 8). In addition, for each of the transcripts, the lowest  
522 normalized values were always observed in patients, and thus lower than the lowest values  
523 measured in control rats.

#### 524 **Substantiate level of inflammation in the amygdala may counterbalance very low level of** 525 **inflammation in the hippocampus of some mTLE patients**

526 Since the 22 patients included in this study had undergone cortico-amygdalo-  
527 hippocampectomy, we also measured the pro-inflammatory index (Fig. 9) and the  
528 housekeeping gene index (Fig. S2) in the amygdala. As for the hippocampus (Fig. S2A), the  
529 housekeeping gene index is highly variable between patients within the amygdala (Fig. S2B),  
530 and is not consistent between the two brain structures (Fig. S2C). We show that the expression  
531 of pro-inflammatory genes in the amygdala is highly variable from one patient to another (Fig.  
532 9A), and very high in some patients (e.g. P10 and P40; Fig. 9A). Interestingly, a comparison for  
533 each patient of the values measured in the hippocampus and the amygdala indicates that for  
534 some, the inflammation measured in the amygdala is stronger than that measured in the  
535 hippocampus (P40, x9.4; P41, x6.05; P16: x5.43; P17: 4.31; P1, x3.37). As a result, for some  
536 patients, the mean value measured in the amygdala-hippocampus complex appears higher  
537 than when only the hippocampus is considered, as in patient P40 (Fig. 9A). Finally, when we  
538 look at the inter-individual variations in the amygdalo-hippocampus pro-inflammatory index,  
539 they are much lower than when only the hippocampus or the amygdala is considered (Fig. 9B).  
540 The lowest amygdalo-hippocampus values were found to be always greater than the lowest

541 values measured either in the hippocampus or the amygdala (Fig. 9). Finally, as for the  
542 hippocampus, we found that using housekeeping genes instead of the SmRNA to normalize  
543 the RT reaction would have led to biased results (Fig. S3B).

544 The amygdalo-hippocampus pro-inflammatory index (PI-I, in A.U.) did not correlate  
545 either with the age (in year) at epilepsy onset ( $PI-I = 6.33 \times \text{age} + 433.2$ ;  $r^2=0.0285$ ) nor with  
546 the duration (in year) of epilepsy ( $PI-I = 1.364 \times \text{duration} + 472.7$ ;  $r^2 = 0.0021$ ).

#### 547 **Inflammation is of low grade in chronic epilepsy compared to explosive inflammation during** 548 **epileptogenesis**

549 The ~ two-fold increase in the pro-inflammatory index in rats with epilepsy developed after  
550 SE induced at the juvenile age (EPI-J) (Fig. 8A) raised the issue of whether this increase was  
551 greater or lesser than that occurring after SE itself, as already questioned using undisputable  
552 quantitative procedures following kainic acid-induced SE [18]. To this end, inflammatory levels  
553 in our two models of mTLE were investigated during epileptogenesis and compared to those  
554 measured during chronic epilepsy. Transcript levels of inflammatory and anti-inflammatory  
555 markers were quantified in the hippocampus of rats during epileptogenesis (at 7 hours, 1 day,  
556 9 days) and during epilepsy (7 weeks) after the onset of SE induced at P21 (SE-W, light blue  
557 bars) or P42 (SE-J, dark blue bars). The results are presented for each pro-inflammatory (Fig.  
558 10) and anti-inflammatory (Fig. 11) markers, as well as for the corresponding pro-  
559 inflammatory and anti-inflammatory indexes (Fig. 12). They reveal that the induction peak  
560 occurred between 7 hours and 1 day after SE for both epileptic models. The comparison of the  
561 peak values of pro-inflammatory markers determined during epileptogenesis with the values  
562 measured during the chronic phase of epilepsy (7 weeks post-SE) reveals that the difference  
563 between these two values ranged between 0.46-fold (TNF) and 740-fold (MCP1) for rats  
564 subjected to SE at weaning (P21) and between 8-fold (TNF) and 781-fold (MCP1) for rats  
565 subjected to SE at the juvenile stage (P42) (Table 4). Hence, the pro-inflammatory index  
566 measured at the peak during epileptogenesis was 17.77- and 23.95-fold greater than that  
567 measured in the chronic phase of epilepsy, for SE induced at P21 and P42, respectively (Table  
568 4).

569

570

571 **Quantitative RNAscope® *in situ* hybridization confirms data obtained by RT-qPCR**

572 Data on transcript levels acquired so far in this study were obtained by RT-qPCR. They indicate  
573 wide variations for most of the studied inflammation markers in the hippocampus both  
574 between patients and between different groups of rats, especially for the latter between the  
575 epileptogenesis period and the chronic phase of epilepsy. In order to rule out any hypothesis  
576 that the observed variations could be the result of random degradation of mRNAs during the  
577 extraction and purification phases of total RNAs, RT-qPCR data for IL1 $\beta$  were compared to  
578 those obtained on fixed brain sections by the RNAscope® technology, which is a highly  
579 quantitative *in situ* hybridization (ISH) method. IL1 $\beta$  was selected for this comparison because  
580 it is one of the most studied inflammation markers in the context of neuroinflammation.  
581 Finally, to carry out this comparison, we selected 5 patients whose IL1 $\beta$ -cDNA copy numbers  
582 were either low (P15 and P45), intermediate (P43 and P44) or high (P42), and the different  
583 time points studied by RT-qPCR during epileptogenesis and the chronic phase of epilepsy in  
584 rats subjected to Pilo-SE at the juvenile (P42) stage. In sections of the hippocampus resected  
585 from mTLE patients, the density of IL1 $\beta$ -mRNA signal (magenta dots) was greater in patient  
586 P42 compared to patient P15 (Fig. S6), as expected, and the surface area occupied by IL1 $\beta$ -  
587 mRNA signal in the 5 selected patients correlated significantly with the corresponding IL1 $\beta$ -  
588 cDNA copy numbers quantified by RT-qPCR (Fig. 13A). In rats subjected to SE at P42, IL1 $\beta$ -  
589 mRNA signal was quantified in the dentate gyrus where it was greater than other regions of  
590 the hippocampus, including CA1 area. The density of IL1 $\beta$ -mRNA signal, measured at 7 hours,  
591 1 day, 9 days and 7 weeks post-SE, was greater at 7 hours post-SE (Fig. S7 and Fig. 13B1) and  
592 significantly correlated with IL1 $\beta$ -cDNA copy numbers quantified by RT-qPCR in different sets  
593 of animals (Fig. 13B2).

594 **Microglial cells seem to produce most of the IL1 $\beta$  during the acute phase**

595 Previous studies using immunohistochemical procedures reported that IL1 $\beta$  was expressed  
596 mainly by astrocytes and more rarely by microglial cells/macrophages in the hippocampus  
597 following pilocarpine-induced SE and self-sustained limbic SE [36], and exclusively by  
598 astrocytes following kainic acid-induced SE [18]. To determine to which extent microglial cells  
599 or astrocytes were each involved in the production of IL1 $\beta$ -mRNA, we used multiplex detection  
600 of IL1 $\beta$ , ITGAM and GFAP transcripts using RNAscope® ISH. We could not combine IL1 $\beta$ -mRNA  
601 ISH with immunohistofluorescent detection of GFAP and ITGAM because antigens recognized

602 by the different antibodies tested were altered by the permeabilization and fixation  
603 procedures in RNAscope® protocols. In patient P42, who had the greatest IL1 $\beta$ -cDNA copy  
604 number, IL1 $\beta$ -mRNA signal (magenta dots) was located in cells bearing morphological features  
605 of glial cells (Fig. S6A). However, the paucity of ITGAM-mRNA and GFAP-mRNA signals at the  
606 location of IL1 $\beta$ -mRNA signal precluded in mTLE patients the identification of IL1 $\beta$ -mRNA  
607 signal as being of astroglial or microglial origin (Fig. S6B-C). In rats, the only time point it was  
608 possible to identify the glial cells expressing IL1 $\beta$ -mRNA was 7 hours post-SE. Cells with a large  
609 and packed IL1 $\beta$ -mRNA signal appeared to be ramified microglial cells, as identified by the  
610 presence of ITGAM-mRNA signal in the core of the IL1 $\beta$ -mRNA signal (Fig. 13C-D). At this time  
611 point, numerous astrocytes also expressed IL1 $\beta$ -mRNA, but at weaker levels compared to  
612 ITGAM+ cells, as depicted by the small surface area occupied by IL1 $\beta$ -mRNA signal with the  
613 dense signal corresponding to GFAP-mRNA (Fig. 13E-F).

## 614 4 | DISCUSSION

615 The current study reports that inflammation in resected hippocampus of patients with mTLE  
616 presented with a high inter-individual variability. Such a variability was also found in the  
617 amygdala. Our intriguing result showing that short-term delay of resected tissue processing  
618 led to large decrease of housekeeping gene mRNAs, precluded the possibility of using post-  
619 mortem tissues to estimate physiological baseline transcript levels in non-epileptic tissues,  
620 and then to evaluate the degree of the inflammatory status in the resected tissues of mTLE  
621 patients. To overcome this problem, as an alternative, we used mTLE models in rats  
622 developing epilepsy after a SE induced either at weaning or at the juvenile stage. These animal  
623 models have the advantage of providing access to healthy control brain tissues. We show that  
624 the data obtained in epileptic rats model a large part of the variability observed in patients. In  
625 addition, in the chronic phase of epilepsy, the levels of selected neuroinflammatory markers  
626 measured in the hippocampus varied between values ranging from 0.87 to 9.55 times those  
627 of controls. We also showed that inflammation during the chronic phase, when present, is of  
628 low grade compared to that measured after an epileptogenic brain insult. Finally, we  
629 demonstrated that microglial cells are the main contributors to the production of interleukin-  
630 1 $\beta$  during the acute phase after SE.

631

## 632 **Methodological considerations**

633 In our study, we chose to evaluate gene expression at the transcript level rather than at the  
634 protein level, because the method mostly used to quantify RNA (calibrated RT and real-time  
635 PCR) is much more quantitative than those used for proteins quantification (Western Blot and  
636 Elisa). Indeed, the two most common methods for protein quantification depend on the  
637 availability of validated antibodies for each of the targeted genes. In addition, we showed in  
638 this study that a given protein (GFAP) did not show the same tissue distribution pattern when  
639 detected with two distinct specific antibodies. By contrast, when considering RNAs, even if  
640 amplification of given cDNAs by PCR requires different primer pairs between humans and rats,  
641 it remains highly specific to the corresponding mRNA. Furthermore, PCR is quantitative as  
642 soon as it is performed on a real-time thermocycler and a calibration curve is used, giving  
643 access to the number of cDNA copies detected. To generate the cDNAs to be amplified by PCR,  
644 we have chosen a method that allows us to calibrate reverse transcription using a synthetic  
645 and exogenous poly-A RNA (SmRNA) (WO20040404092414) [13, 29, 30, 39]. This contrasts  
646 with the selection of one or more endogenous genes, so-called housekeeping genes,  
647 considered as internal controls and, *de facto*, as being *a priori* invariant in all studies that use  
648 this kind of standardization. Our methodological approach is all the more justified when  
649 considering our results showing that three mostly used housekeeping genes greatly vary  
650 between patients.

651 When several mRNAs of inflammation markers are quantified, and some of them vary upward  
652 while others vary downward, one of the major difficulties is to define whether the overall level  
653 of inflammation has increased or decreased. For this reason, inspired by Gene Ontology  
654 analysis, we have established three indexes to report "global" pro-inflammatory, anti-  
655 inflammatory and glial activation states, based on a number of mRNAs for which we also  
656 provided individual quantifications. To generate these indexes, we have chosen prototypical  
657 pro-inflammatory cytokines and chemokines IL1 $\beta$ , IL6, TNF, MCP1 and MIP1 $\alpha$  involved in  
658 epilepsy pathophysiology [3, 6, 48], anti-inflammatory cytokines IL4, IL10 and IL13 which  
659 expression is increased in various neurological pathologies [19, 26, 28], and finally GFAP and  
660 ITGAM, which are respective markers of astrogliosis and microgliosis, both involved in epilepsy  
661 [11].

662

### 663 ***Post-mortem tissues***

664 Inflammation has for years been considered as a key contributor to the pathophysiology of  
665 epilepsy [46], which encouraged several studies to investigate the degree of  
666 neuroinflammation in the epileptic brain. One of the commonalities between most of these  
667 studies, regardless of the quantification methodology employed, has been the use of post-  
668 mortem tissue obtained from autopsy non-epileptic control subjects to compare with values  
669 measured in specimen of epileptic patients. Although not epileptic, some individuals suffered  
670 from other neurological conditions such as brain tumor or had experienced traumatic injuries,  
671 raising concerns about the inflammatory status of these samples in comparison with healthy  
672 tissues [15, 41]. Another issue is the delay of processing of these post-mortem tissues, ranging  
673 from 4 to 20.5 hours [2, 10, 15, 21, 23, 31, 36, 40, 41]. While earlier studies have shown that  
674 RNA can remain substantially intact, even for long periods of time after death [16, 20, 34],  
675 other studies have reported that post-mortem interval should be controlled in human and  
676 animal models [5], especially for mRNA profiling studies [14, 45]. In addition, a recent study  
677 has provided evidence that data obtained for miRNAs extracted from resected tissues of  
678 epileptic patients were different to those of post-mortem tissues from epileptic patients [37].  
679 A further concern not raised so far about the use of post-mortem human tissues in general is  
680 related to the heterogeneity of the individuals included in a study. Thus, adding over to this  
681 heterogeneity the variability related to the uncontrolled degradation of the mRNAs only adds  
682 uncertainty to the data produced.

683 Our results obtained on hippocampal tissues from 10 patients with epilepsy showed that a  
684 short (45-90 min) delay in the processing of a sample, although handled according to standard  
685 procedures, resulted in substantial decrease in three housekeeping gene transcript levels. This  
686 may reflect a specific degradation of mRNAs, not detected by the widely used reference  
687 method based on the integrity of two very abundant ribosomal RNAs. For all these above-  
688 mentioned reasons, we preferred not to use post-mortem tissues to define basal  
689 inflammatory levels in the hippocampus.

### 690 ***Variable levels of inflammation in the hippocampus of mTLE patients***

691 While several studies have reported increased inflammation in the resected hippocampus of  
692 mTLE patients when compared to post-mortem controls [15, 21, 31, 36, 52], greater IL1 $\beta$  and  
693 IL6 levels have also been measured in the resected hippocampus of non-epileptic patients

694 compared to mTLE patients [41]. These conflicting data fuel the debate about whether  
695 substantial inflammation is present in the epileptic focus [2]. In our patient study, we do not  
696 have physiological baseline mRNA levels of the targeted cytokines and chemokines due to the  
697 lack of appropriate human control tissues. However, we show that the variations of the mRNA  
698 levels were highly variable in resected hippocampi of mTLE patients, certain markers of  
699 inflammation being undetectable in some while they were very easily detectable in others.  
700 Since it has been shown that brain structures involved in the epileptic network, but at a  
701 distance from the epileptic focus, may have higher levels of inflammation than in the epileptic  
702 focus itself [41], we also measured inflammation levels in the amygdala of the 22 patients  
703 included in our study. Inter-individual variations in the pro-inflammatory and cell  
704 inflammation indexes have also been found in the amygdala but without correlation between  
705 the hippocampus and the amygdala. A high level of inflammation in the amygdala may thus  
706 be associated with a low level in the hippocampus, or vice versa. This is particularly the case  
707 for two patients who had radically opposite levels of inflammatory marker expression  
708 between the two brain structures (e.g. Patient 7 and Patient 40). These variations did not  
709 correlate with gender, age, duration of epilepsy, and ASDs. Our study is thus in support of the  
710 hypothesis that inflammation should be investigated not only at the site of the epileptic  
711 hippocampus, but also within the entire epileptic network to have a more integrative overview  
712 of the brain inflammatory status in mTLE.

713 An important question is whether there is a strong link between inflammation in the  
714 hippocampus and the recurrence of seizures. In our study, this question could not be  
715 answered in rats, since our preliminary studies showed that the sole implantation of screws  
716 into the skull induced long lasting brain inflammation in the underneath cortex, as well as in  
717 the hippocampus (data not shown). In the human part of our study, although data on seizure  
718 frequency have only been obtained in 5 patients, they do not indicate a positive correlation  
719 between pro-inflammatory cytokine levels in the hippocampus and seizure frequency. A PET  
720 study evaluating microglial activation in a mTLE patient showed that it was greater 36 hours  
721 after the last seizure compared to a seizure-free period [4]. It cannot thus be excluded that  
722 patients with the highest inflammatory levels are those who experienced the most recent  
723 seizures.



724 Our choice to model mTLE in rats after SE induced by pilocarpine provided us the possibility  
725 to have access to physiological baseline values for the different markers of inflammation  
726 measured in the hippocampus. When taking the pro-inflammatory and anti-inflammatory  
727 indexes, or the individual mRNAs constituting these indexes, our results show that once  
728 epilepsy was developed, rats whose SE was triggered at weaning (P21) were not  
729 distinguishable from controls, unlike rats whose SE was induced at the juvenile stage (P42).  
730 Since some epileptic rats had similar levels of inflammation to that of control rats, we  
731 established the inter-individual variability that exists in the entire cohort of rats, including  
732 both controls and all epileptic rats. Given the translational approach of our study, we  
733 compared this inter-individual variability to that established between the 22 patients with  
734 mTLE. Intriguingly, the inter-individual variability in the rats almost overlapped the variability  
735 observed between patients with mTLE. This comparison suggests that epilepsy may be active  
736 despite a barely detectable level of inflammation, at least as represented by the selected  
737 genes.

738 ***Inflammation in epilepsy is low grade compared to that measured in the acute phase after***  
739 ***status epilepticus***

740 One of the major added values of our study is to have been able to quantify with the exact  
741 same methodology the mRNAs of some prototypical markers of inflammation, both in mTLE  
742 patients and in rats in different phases of epileptogenesis following pilocarpine-induced SE. In  
743 addition to providing us with valuable controls to establish physiological baseline levels of  
744 inflammation, the advantage of the animal model is to give us access to the entire period of  
745 epileptogenesis following SE, which is of course impossible in humans.

746 Very few studies have reported variations in mRNA levels of prototypic markers of  
747 inflammation during epileptogenesis up to epilepsy onset, with a method as quantitative as  
748 RT-qPCR. Recently, changes in IL1 $\beta$  and TNF mRNA levels were quantified in the hippocampus  
749 in a mouse model of mTLE developed after SE induced by intrahippocampal administration of  
750 kainic acid. Although the onset of epilepsy in this model was rapid (<7 days), quantification  
751 was limited to the first week post-SE and showed that the apparent peak of inflammation was  
752 between 2h and 72h, with values at 7 days still very high but not statistically different from  
753 that of controls [18]. Maximum increases, corrected by 3 reference genes, were in the range  
754 of 15 to 50-fold compared to controls for IL1 $\beta$  and TNF, respectively. In our study, after

755 induction of SE by pilocarpine, the maximum increases reported, without the use of reference  
756 genes thanks to the use of an external calibrator, were of an order of magnitude equivalent  
757 to that of the intrahippocampal kainic acid (KA) model in mice, ranging from 6 to 55-fold  
758 relative to controls for TNF and IL1 $\beta$ , respectively. It is thus clear that the degree of  
759 inflammation in the hippocampus of epileptic rats, 7 weeks after SE induced at P42, was of  
760 low-grade compared to the explosive inflammation measured in the first hours to days  
761 following SE.

762 ***The extent of neurodegeneration and gliosis might depend on the degree of inflammation***  
763 ***in response to an epileptogenic brain insult and the delay to recover baseline levels***

764 Prior studies have shown that the inflammation in the hippocampus of mTLE patients was not  
765 greater in the presence of hippocampal sclerosis [2, 21]. Here, we provide evidence that  
766 patients who had the highest values of pro-inflammatory index (P07, P10, P13, P44 and P49)  
767 were those with the greatest scores of neuronal loss and reactive gliosis. In our animal study,  
768 only epileptic rats whose SE was induced at P42 had a pro-inflammatory index above that of  
769 controls and massive lesions in cortico-limbic and thalamic areas (P42) [8, 9, 29, 39, 51],  
770 compared to epileptic rats whose SE was induced at P21. The comparison of SE induced at P21  
771 and P42 highlighted that the peak of the pro-inflammatory index was higher at P42 than at  
772 P21, with a slower return to baseline values, suggesting that a higher and longer exposure to  
773 inflammatory molecules might partly explain the massive neurodegenerative processes and  
774 gliosis observed in epileptic rats when SE was induced at P42. It is noteworthy that in epileptic  
775 rats subjected to pilocarpine-induced SE at P42, the apparent peaks were much more transient  
776 (between 7h and 24h post-SE) than those observed in the intrahippocampal KA mouse model  
777 that present with massive neurodegenerative processes and gliosis [18]. This suggests that the  
778 extent of neurodegeneration and gliosis in mTLE models is dependent on the peak of  
779 inflammation and the time to return to baseline following the epileptogenic brain insult; this  
780 might also be the case in patients with mTLE.

781 ***Which brain cells contribute the most to neuroinflammation?***

782 Of the three cytokines studied (IL1 $\beta$ , IL6 and TNF), IL1 $\beta$  was the one that was still at a higher  
783 level than controls in rats that developed epilepsy after the induction of SE at P42. To identify  
784 which cells expressed IL1 $\beta$ , we had initially opted for double immunohistological labeling, but

785 the radically different results obtained with the different anti-IL1 $\beta$  antibodies tested (none of  
786 which were validated) led us to go with quantitative RNAscope<sup>®</sup> *in situ* hybridization. In  
787 accordance with RT-qPCR results, maximum signal was observed 7h post-SE, and was clearly  
788 located in cells expressing *Irgam*-mRNA, with a morphology resembling that of activated  
789 microglial cells. Very small amounts of IL1 $\beta$ -mRNA were also detected in astrocytes at 7h post-  
790 SE. Due to the rapid decrease in IL1 $\beta$ -mRNA levels following SE, the dispersion of the  
791 corresponding signal did not make it possible to identify whether IL1 $\beta$ -mRNA was expressed  
792 in microglial cells or astrocytes. According to the results of previous studies, even if IL1 $\beta$ -  
793 immunopositive cells have been shown to resemble activated microglial cells in the hours  
794 following SE induced by intrahippocampal KA in rats [47], IL1 $\beta$  has been shown to be expressed  
795 in the hippocampus mainly by astrocytes at all phases of epileptogenesis and once epilepsy  
796 has developed in rats after pilocarpine-induced SE or after self-sustained SE [36] or at epilepsy  
797 onset in mice subjected to SE after intrahippocampal KA administration [18].

798 While studies in mice after pilocarpine-induced SE indicate that myeloid infiltrates (essentially  
799 macrophages) are responsible for the majority of the pro-inflammatory cytokines measured  
800 in brain tissue in the acute phase (24h-96h) post-SE [44, 50], our data acquired in rats  
801 subjected to pilocarpine-induced SE show that the inflammatory peak occurred 7h post-SE, at  
802 a time when no myeloid infiltrate was detected, whereas when these infiltrates were present  
803 between 24 and 48 hours post-SE, mRNA levels of pro-inflammatory cytokines were  
804 dramatically decreasing. In addition, the detection of IL1 $\beta$  by RNAscope<sup>®</sup> *in situ* hybridization  
805 did not make it possible to demonstrate, 24 hours post-SE, a stronger signal in round-shaped  
806 cells, resembling infiltrating macrophages. Therefore, if our *in situ* quantification methods are  
807 correct, one must consider that either the contribution of macrophages to brain inflammation  
808 following SE is radically different between rat and mouse models, or that the rather long  
809 procedures needed for separating microglial cells from macrophages by FACS in mice  
810 differently affected the turnover of cytokine mRNAs, leading to the differences observed  
811 between the two populations of cells.

### 812 ***Translational relevance of the study***

813 One of the major problems in studies involving brain biopsies taken from patients is that while  
814 the data obtained from these biopsies can be compared with each other, they cannot be  
815 compared with data that would have been obtained in an equivalent manner from healthy

816 subjects. The results of our study clearly show that a delay of approximately 45-90 min  
817 between the surgical resection of the tissue and its freezing dramatically compromises the  
818 quantity of mRNAs. We have therefore chosen not to use hippocampi or brain tissues obtained  
819 post mortem, which mostly takes well over 90 min after death. Just as we decided not to use  
820 brain tissue from patients with pathologies other than epilepsy. With all the necessary  
821 precautions, in order to define what could be the level of inflammation in the resected tissues  
822 of patients with mTLE, in comparison to physiological baseline level on the one hand, and in  
823 comparison to the explosive inflammatory conditions generally observed in the acute phase  
824 of severe brain insults on the other hand, we have chosen to exploit to the maximum the  
825 predictive value that animal models can provide. To do so, we compared the inter-individual  
826 variability observed in the complete cohort of rats, including both control rats and two  
827 complementary models of epileptic rats, to that observed in patients with mTLE. This allowed  
828 us to propose that the level of inflammation in the hippocampus of patients with mTLE was  
829 low-grade, and that some may even have active epilepsy with inflammation levels almost  
830 identical to those of controls.

831 Our amygdala data also show that brain inflammation in mTLE must be looked at beyond the  
832 hippocampus, throughout the entire brain network involved in epilepsy. At this stage, the  
833 question that arises is how to measure the level of brain inflammation non-invasively, and, in  
834 the best case, from peripheral biomarkers [46].

### 835 ***Limitations of the study***

836 One of the major limitations of our study is that we were unable to measure the EEG activity  
837 of rats, by fear of inducing significant inflammatory levels at the hippocampal level, which  
838 could themselves have modified the course of the disease.

839 In our study, we explored inflammation by measuring the most studied prototypical cytokines  
840 and chemokines in epilepsy [43, 48]. However, the members of these classes of molecules  
841 extend far beyond those we have studied [52]. In addition, eicosonoids, which are metabolic  
842 derivatives of arachidonic acid, play a major role in inflammatory signaling and were not  
843 examined in this study, whereas their deregulation has clearly been identified in epilepsy [46].

844 Targeting mRNAs by RT-qPCR is certainly one of the most accessible methods of measuring  
845 gene expression in the most quantitative and reliable way possible. However, variations in the  
846 corresponding proteins would have certainly provided more relevant information on the most

847 active signaling pathways in epileptic tissue. Easier access to high-throughput proteomics  
848 should help solve this issue, at least in part. It remains that we had trouble identifying the cells  
849 expressing cytokines at all stages of the development of the disease in animal models and on  
850 the resected hippocampi of mTLE patients. Such identification of cells expressing the proteins  
851 of interest will depend on the development of more specific and better validated antibodies.

## 852 7 | ACKNOWLEDGEMENTS

853 Nadia Gasmi was granted a PhD fellowship from the Fondation pour la Recherche Médicale  
854 (FRM grant number ECO20160736074 to NG).

## 855 8 | REFERENCES

- 856 1. A. Morales and L. Bezin Method of calibration of reverse transcription using a synthetic  
857 messenger RNA (SmRNA), patent WO2004.092414
- 858 2. Aalbers MW, Rijkers K, Majoie HJM, Dings JT, Schijns OEMG, Schipper S, De Baets MH,  
859 Kessels A, Vles JSH, Hoogland G (2014) The influence of neuropathology on brain  
860 inflammation in human and experimental temporal lobe epilepsy. *Journal of*  
861 *Neuroimmunology* 271:36–42. doi: 10.1016/j.jneuroim.2014.03.016
- 862 3. Aronica E, Bauer S, Bozzi Y, Caleo M, Dingledine R, Gorter JA, Henshall DC, Kaufer D, Koh S,  
863 Löscher W, Louboutin J-P, Mishto M, Norwood BA, Palma E, Poulter MO, Terrone G,  
864 Vezzani A, Kaminski RM (2017) Neuroinflammatory targets and treatments for epilepsy  
865 validated in experimental models. *Epilepsia* 58:27–38. doi: 10.1111/epi.13783
- 866 4. Butler T, Li Y, Tsui W, Friedman D, Maoz A, Wang X, Harvey P, Tanzi E, Morim S, Kang Y,  
867 Mosconi L, Talos D, Kuzniecky R, Vallhabjosula S, Thesen T, Glodzik L, Ichise M, Silbersweig  
868 D, Stern E, de Leon MJ, French J (2016) Transient and chronic seizure-induced inflammation  
869 in human focal epilepsy. *Epilepsia* 57:e191-194. doi: 10.1111/epi.13457
- 870 5. Catts VS, Catts SV, Fernandez HR, Taylor JM, Coulson EJ, Lutze-Mann LH (2005) A  
871 microarray study of post-mortem mRNA degradation in mouse brain tissue. *Brain Res Mol*  
872 *Brain Res* 138:164–177. doi: 10.1016/j.molbrainres.2005.04.017
- 873 6. Cerri C, Caleo M, Bozzi Y (2017) Chemokines as new inflammatory players in the  
874 pathogenesis of epilepsy. *Epilepsy Research* 136:77–83. doi:  
875 10.1016/j.eplepsyres.2017.07.016
- 876 7. Chen Q-L, Xia L, Zhong S-P, Wang Q, Ding J, Wang X (2020) Bioinformatic analysis identifies  
877 key transcriptome signatures in temporal lobe epilepsy. *CNS Neuroscience & Therapeutics*  
878 26:1266–1277. doi: <https://doi.org/10.1111/cns.13470>
- 879 8. Cilio MR, Sogawa Y, Cha B-H, Liu X, Huang L-T, Holmes GL (2003) Long-term effects of status  
880 epilepticus in the immature brain are specific for age and model. *Epilepsia* 44:518–528.  
881 doi: 10.1046/j.1528-1157.2003.48802.x
- 882 9. Cross DJ, Cavazos JE (2007) Synaptic reorganization in subiculum and CA3 after early-life  
883 status epilepticus in the kainic acid rat model. *Epilepsy Res* 73:156–165. doi:  
884 10.1016/j.eplepsyres.2006.09.004
- 885 10. Das A, Wallace GC, Holmes C, McDowell ML, Smith JA, Marshall JD, Bonilha L, Edwards JC,

- 886 Glazier SS, Ray SK, Banik NL (2012) Hippocampal tissue of patients with refractory temporal  
887 lobe epilepsy is associated with astrocyte activation, inflammation, and altered expression  
888 of channels and receptors. *Neuroscience* 220:237–246. doi:  
889 10.1016/j.neuroscience.2012.06.002
- 890 11. Devinsky O, Vezzani A, Najjar S, De Lanerolle NC, Rogawski MA (2013) Glia and epilepsy:  
891 excitability and inflammation. *Trends in Neurosciences* 36:174–184. doi:  
892 10.1016/j.tins.2012.11.008
- 893 12. Dubé C, Vezzani A, Behrens M, Bartfai T, Baram TZ (2005) Interleukin-1 $\beta$  contributes to the  
894 generation of experimental febrile seizures: IL-1 $\beta$  and Febrile Seizures. *Ann Neurol* 57:152–  
895 155. doi: 10.1002/ana.20358
- 896 13. Fares RP, Belmeguenai A, Sanchez PE, Kouchi HY, Bodennec J, Morales A, Georges B,  
897 Bonnet C, Bouvard S, Sloviter RS, Bezin L (2013) Standardized environmental enrichment  
898 supports enhanced brain plasticity in healthy rats and prevents cognitive impairment in  
899 epileptic rats. *PLoS ONE* 8:e53888. doi: 10.1371/journal.pone.0053888
- 900 14. Ferreira PG, Muñoz-Aguirre M, Reverter F, Sá Godinho CP, Sousa A, Amadoz A, Sodaei R,  
901 Hidalgo MR, Pervouchine D, Carbonell-Caballero J, Nurtdinov R, Breschi A, Amador R,  
902 Oliveira P, Çubuk C, Curado J, Aguet F, Oliveira C, Dopazo J, Sammeth M, Ardlie KG, Guigó  
903 R (2018) The effects of death and post-mortem cold ischemia on human tissue  
904 transcriptomes. *Nat Commun* 9:490. doi: 10.1038/s41467-017-02772-x
- 905 15. Fiala M, Avagyan H, Merino JJ, Bernas M, Valdivia J, Espinosa-Jeffrey A, Witte M, Weinand  
906 M (2013) Chemotactic and mitogenic stimuli of neuronal apoptosis in patients with  
907 medically intractable temporal lobe epilepsy. *Pathophysiology* 20:59–69. doi:  
908 10.1016/j.pathophys.2012.02.003
- 909 16. Fitzpatrick CJ, Gopalakrishnan S, Cogan ES, Yager LM, Meyer PJ, Lovic V, Saunders BT,  
910 Parker CC, Gonzales NM, Aryee E, Flagel SB, Palmer AA, Robinson TE, Morrow JD (2013)  
911 Variation in the Form of Pavlovian Conditioned Approach Behavior among Outbred Male  
912 Sprague-Dawley Rats from Different Vendors and Colonies: Sign-Tracking vs. Goal-  
913 Tracking. *PLoS ONE* 8:e75042. doi: 10.1371/journal.pone.0075042
- 914 17. Florell SR, Coffin CM, Holden JA, Zimmermann JW, Gerwels JW, Summers BK, Jones DA,  
915 Leachman SA (2001) Preservation of RNA for functional genomic studies: a  
916 multidisciplinary tumor bank protocol. *Mod Pathol* 14:116–128. doi:  
917 10.1038/modpathol.3880267
- 918 18. Frigerio F, Pasqualini G, Craparotta I, Marchini S, van Vliet EA, Foerch P, Vandenplas C,  
919 Leclercq K, Aronica E, Porcu L, Pistorius K, Colas RA, Hansen TV, Perretti M, Kaminski RM,  
920 Dalli J, Vezzani A (2018) n-3 Docosapentaenoic acid-derived protectin D1 promotes  
921 resolution of neuroinflammation and arrests epileptogenesis. *Brain*. doi:  
922 10.1093/brain/awy247
- 923 19. Gadani SP, Cronk JC, Norris GT, Kipnis J (2012) IL-4 in the brain: a cytokine to remember. *J*  
924 *Immunol* 189:4213–4219. doi: 10.4049/jimmunol.1202246
- 925 20. Heinrich M, Matt K, Lutz-Bonengel S, Schmidt U (2007) Successful RNA extraction from  
926 various human postmortem tissues. *Int J Legal Med* 121:136–142. doi: 10.1007/s00414-  
927 006-0131-9
- 928 21. Kan AA, de Jager W, de Wit M, Heijnen C, van Zuiden M, Ferrier C, van Rijen P, Gosselaar  
929 P, Hessel E, van Nieuwenhuizen O, de Graan PNE (2012) Protein expression profiling of  
930 inflammatory mediators in human temporal lobe epilepsy reveals co-activation of multiple  
931 chemokines and cytokines. *J Neuroinflammation* 9:712. doi: 10.1186/1742-2094-9-207

- 932 22. Klein P, Dingledine R, Aronica E, Bernard C, Blümcke I, Boison D, Brodie MJ, Brooks-Kayal  
933 AR, Engel J, Forcelli PA, Hirsch LJ, Kaminski RM, Klitgaard H, Kobow K, Lowenstein DH, Pearl  
934 PL, Pitkänen A, Puhakka N, Rogawski MA, Schmidt D, Sillanpää M, Sloviter RS, Steinhäuser  
935 C, Vezzani A, Walker MC, Löscher W (2018) Commonalities in epileptogenic processes from  
936 different acute brain insults: Do they translate? *Epilepsia* 59:37–66. doi:  
937 10.1111/epi.13965
- 938 23. Leal B, Chaves J, Carvalho C, Rangel R, Santos A, Bettencourt A, Lopes J, Ramalheira J, Silva  
939 BM, da Silva AM, Costa PP (2017) Brain expression of inflammatory mediators in Mesial  
940 Temporal Lobe Epilepsy patients. *Journal of Neuroimmunology* 313:82–88. doi:  
941 10.1016/j.jneuroim.2017.10.014
- 942 24. Lehtimäki KA, Keränen T, Palmio J, Mäkinen R, Hurme M, Honkaniemi J, Peltola J (2007)  
943 Increased plasma levels of cytokines after seizures in localization-related epilepsy. *Acta  
944 Neurol Scand* 116:226–230. doi: 10.1111/j.1600-0404.2007.00882.x
- 945 25. Leroy C, Pierre K, Simpson IA, Pellerin L, Vannucci SJ, Nehlig A (2011) Temporal changes in  
946 mRNA expression of the brain nutrient transporters in the lithium-pilocarpine model of  
947 epilepsy in the immature and adult rat. *Neurobiol Dis* 43:588–597. doi:  
948 10.1016/j.nbd.2011.05.007
- 949 26. Lobo-Silva D, Carriche GM, Castro AG, Roque S, Saraiva M (2016) Balancing the immune  
950 response in the brain: IL-10 and its regulation. *J Neuroinflammation* 13:297. doi:  
951 10.1186/s12974-016-0763-8
- 952 27. Lorigados Pedre L, Morales Chacón LM, Orozco Suárez S, Pavón Fuentes N, Estupiñán Díaz  
953 B, Serrano Sánchez T, García Maeso I, Rocha Arrieta L (2013) Inflammatory mediators in  
954 epilepsy. *Curr Pharm Des* 19:6766–6772. doi: 10.2174/1381612811319380009
- 955 28. Mori S, Maher P, Conti B (2016) Neuroimmunology of the Interleukins 13 and 4. *Brain  
956 Sciences* 6:18. doi: 10.3390/brainsci6020018
- 957 29. Nadam J, Navarro F, Sanchez P, Moulin C, Georges B, Laglaine A, Pequignot J-M, Morales  
958 A, Rylvlin P, Bezin L (2007) Neuroprotective effects of erythropoietin in the rat hippocampus  
959 after pilocarpine-induced status epilepticus. *Neurobiol Dis* 25:412–426. doi:  
960 10.1016/j.nbd.2006.10.009
- 961 30. Ogier M, Belmeguenai A, Lieutaud T, Georges B, Bouvard S, Carré E, Canini F, Bezin L (2017)  
962 Cognitive Deficits and Inflammatory Response Resulting from Mild-to-Moderate Traumatic  
963 Brain Injury in Rats Are Exacerbated by Repeated Pre-Exposure to an Innate Stress  
964 Stimulus. *Journal of Neurotrauma* 34:1645–1657. doi: 10.1089/neu.2016.4741
- 965 31. Omran A, Peng J, Zhang C, Xiang Q-L, Xue J, Gan N, Kong H, Yin F (2012) Interleukin-1 $\beta$  and  
966 microRNA-146a in an immature rat model and children with mesial temporal lobe epilepsy:  
967 Neuroinflammation and MTLE Development. *Epilepsia* 53:1215–1224. doi:  
968 10.1111/j.1528-1167.2012.03540.x
- 969 32. Pascente R, Frigerio F, Rizzi M, Porcu L, Boido M, Davids J, Zaben M, Tolomeo D, Filibian M,  
970 Gray WP, Vezzani A, Ravizza T (2016) Cognitive deficits and brain myo-Inositol are early  
971 biomarkers of epileptogenesis in a rat model of epilepsy. *Neurobiol Dis* 93:146–155. doi:  
972 10.1016/j.nbd.2016.05.001
- 973 33. Pernhorst K, Herms S, Hoffmann P, Cichon S, Schulz H, Sander T, Schoch S, Becker AJ, Grote  
974 A (2013) TLR4, ATF-3 and IL8 inflammation mediator expression correlates with seizure  
975 frequency in human epileptic brain tissue. *Seizure* 22:675–678. doi:  
976 10.1016/j.seizure.2013.04.023

- 977 34. Preece P, Virley DJ, Costandi M, Coombes R, Moss SJ, Mudge AW, Jazin E, Cairns NJ (2003)  
978 An optimistic view for quantifying mRNA in post-mortem human brain. *Brain Res Mol Brain*  
979 *Res* 116:7–16. doi: 10.1016/s0169-328x(03)00208-0
- 980 35. Rana A, Musto AE (2018) The role of inflammation in the development of epilepsy. *J*  
981 *Neuroinflammation* 15:144. doi: 10.1186/s12974-018-1192-7
- 982 36. Ravizza T, Gagliardi B, Noé F, Boer K, Aronica E, Vezzani A (2008) Innate and adaptive  
983 immunity during epileptogenesis and spontaneous seizures: Evidence from experimental  
984 models and human temporal lobe epilepsy. *Neurobiology of Disease* 29:142–160. doi:  
985 10.1016/j.nbd.2007.08.012
- 986 37. Roncon P, Zucchini S, Ferracin M, Marucci G, Giulioni M, Michelucci R, Rubboli G, Simonato  
987 M (2017) Is autopsy tissue a valid control for epilepsy surgery tissue in microRNA studies?  
988 *Epilepsia Open* 2:90–95. doi: 10.1002/epi4.12023
- 989 38. Ryvlin P, Cross JH, Rheims S (2014) Epilepsy surgery in children and adults. *Lancet Neurol*  
990 13:1114–1126. doi: 10.1016/S1474-4422(14)70156-5
- 991 39. Sanchez PE, Fares RP, Risso J-J, Bonnet C, Bouvard S, Le-Cavorsin M, Georges B, Moulin C,  
992 Belmeguenai A, Bodennec J, Morales A, Pequignot J-M, Baulieu E-E, Levine RA, Bezin L  
993 (2009) Optimal neuroprotection by erythropoietin requires elevated expression of its  
994 receptor in neurons. *Proceedings of the National Academy of Sciences* 106:9848–9853.  
995 doi: 10.1073/pnas.0901840106
- 996 40. Sheng JG, Boop FA, Mrak RE (1994) Increased Neuronal 8-Amyloid Precursor Protein  
997 Expression in Human Temporal Lobe Epilepsy: Association with Interleukin-1 a  
998 Immunoreactivity. *J Neurochem* 63:8
- 999 41. Strauss KI, Elisevich KV (2016) Brain region and epilepsy-associated differences in  
1000 inflammatory mediator levels in medically refractory mesial temporal lobe epilepsy. *J*  
1001 *Neuroinflammation* 13:270. doi: 10.1186/s12974-016-0727-z
- 1002 42. Terrone G, Balosso S, Pauletti A, Ravizza T, Vezzani A (2019) Inflammation and reactive  
1003 oxygen species as disease modifiers in epilepsy. *Neuropharmacology* 107742. doi:  
1004 10.1016/j.neuropharm.2019.107742
- 1005 43. Terrone G, Salamone A, Vezzani A (2017) Inflammation and Epilepsy: Preclinical Findings  
1006 and Potential Clinical Translation. *Curr Pharm Des* 23:5569–5576. doi:  
1007 10.2174/1381612823666170926113754
- 1008 44. Varvel NH, Neher JJ, Bosch A, Wang W, Ransohoff RM, Miller RJ, Dingledine R (2016)  
1009 Infiltrating monocytes promote brain inflammation and exacerbate neuronal damage after  
1010 status epilepticus. *Proc Natl Acad Sci USA* 113:E5665–E5674. doi:  
1011 10.1073/pnas.1604263113
- 1012 45. Vennemann M, Koppelkamm A (2010) Postmortem mRNA profiling II: Practical  
1013 considerations. *Forensic Sci Int* 203:76–82. doi: 10.1016/j.forsciint.2010.07.007
- 1014 46. Vezzani A, Balosso S, Ravizza T (2019) Neuroinflammatory pathways as treatment targets  
1015 and biomarkers in epilepsy. *Nat Rev Neurol* 15:459–472. doi: 10.1038/s41582-019-0217-x
- 1016 47. Vezzani A, Conti M, De Luigi A, Ravizza T, Moneta D, Marchesi F, De Simoni MG (1999)  
1017 Interleukin-1 $\beta$  Immunoreactivity and Microglia Are Enhanced in the Rat Hippocampus by  
1018 Focal Kainate Application: Functional Evidence for Enhancement of Electrographic  
1019 Seizures. *J Neurosci* 19:5054–5065. doi: 10.1523/JNEUROSCI.19-12-05054.1999
- 1020 48. Vezzani A, French J, Bartfai T, Baram TZ (2011) The role of inflammation in epilepsy. *Nat*



- 1021 Rev Neurol 7:31–40. doi: 10.1038/nrneurol.2010.178
- 1022 49. Vezzani A, Friedman A, Dingledine RJ (2013) The role of inflammation in epileptogenesis.  
1023 Neuropharmacology 69:16–24. doi: 10.1016/j.neuropharm.2012.04.004
- 1024 50. Vinet J, Vainchtein ID, Spano C, Giordano C, Bordini D, Curia G, Dominici M, Boddeke  
1025 HWGM, Eggen BJL, Biagini G (2016) Microglia are less pro-inflammatory than myeloid  
1026 infiltrates in the hippocampus of mice exposed to status epilepticus: Inflammatory Cells  
1027 and Epileptogenesis. *Glia* 64:1350–1362. doi: 10.1002/glia.23008
- 1028 51. Voutsinos-Porche B, Koning E, Kaplan H, Ferrandon A, Guenounou M, Nehlig A, Motte J  
1029 (2004) Temporal patterns of the cerebral inflammatory response in the rat lithium-  
1030 pilocarpine model of temporal lobe epilepsy. *Neurobiol Dis* 17:385–402. doi:  
1031 10.1016/j.nbd.2004.07.023
- 1032 52. de Vries EE, van den Munckhof B, Braun KPJ, van Royen-Kerkhof A, de Jager W, Jansen FE  
1033 (2016) Inflammatory mediators in human epilepsy: A systematic review and meta-analysis.  
1034 *Neuroscience & Biobehavioral Reviews* 63:177–190. doi: 10.1016/j.neubiorev.2016.02.007
- 1035

## 1036 9 | FIGURE AND TABLE LEGENDS

1037 **Fig. 1 Delayed cryopreservation of human brain tissue significantly alters transcript levels of**  
1038 **housekeeping genes.** Hippocampus from 3 groups of TLE patients were resected surgically and frozen  
1039 in liquid nitrogen during the 5 minutes (Group 1: P01-P17; Group 3: P40-P49; green box and whisker  
1040 plots) or 45 to 90 minutes (Group 2; P18-P29 group, yellow box and whiskers plot) after resection.  
1041 Transcript levels of three housekeeping genes (DMD, GAPDH and HPRT1) were quantified. Box-and-  
1042 whisker plots model the distribution of each value around the median of the cDNA copy number  
1043 measured by RT-qPCR. Mean is represented by black dots. Outliers are represented by diamonds.  
1044 Tukey's *post-hoc* analysis following one-way ANOVA: \*  $p < 0.05$ , \*\*  $p < 0.01$ , \*\*\*  $p < 0.001$

1045 **Fig. 2 Patients with TLE are heterogeneously distributed regarding the molecular and cellular**  
1046 **markers of inflammation measured in the hippocampus.** Transcript level of pro-inflammatory  
1047 cytokines (IL1 $\beta$ , IL6, TNF), chemokines (MCP1, MIP1 $\alpha$ ), anti-inflammatory cytokine IL10, and cellular  
1048 markers (GFAP for astrocytes, ITGAM for microglia/macrophages) were measured in resected  
1049 hippocampus of TLE patients (n=22). Each point represents a patient, and individual values are  
1050 expressed in percent of the mean value for each marker

1051 **Fig. 3 Individual inflammatory indexes in the hippocampus of TLE patients.** Distribution of the values  
1052 of pro-inflammatory index (a), and inflammation cell index (b) in resected hippocampus of TLE patients  
1053 (n=22). Indexes were calculated from transcript levels as described in the methods section

1054 **Fig. 4 Absence of massive neurodegeneration in the brain of Sprague-Dawley rats after Pilo-SE**  
1055 **induced at weaning.** a Illustration of NeuN-immunolabeling at 36 days of age, in a control rat and in a  
1056 rat subjected to SE 15 days earlier (P21). b Enlarged observations of NeuN-immunolabeling in brain  
1057 regions of the sections presented in (a). Note that these regions are usually affected by massive  
1058 neurodegeneration when SE is induced at P42 (Nadam et al., 2007; Sanchez et al., 2009). c  
1059 Quantification of the surface area occupied by NeuN-immunolabeling in the DG, 7 weeks post-SE  
1060 (CTRL, n=13 sections from 5 rats; SE, n= 18 sections from 6 rats). Abbreviations: BLA, basolateral  
1061 nucleus of the amygdala; D, day; DG, dentate gyrus; dTH, dorsal thalamus; IAC, insular agranular cortex;  
1062 NCX, neocortex

1063 **Fig. 5 Expression of cell markers (ITGAM and GFAP) after Pilo-SE.** Transcript values of ITGAM (a) and  
1064 GFAP (b) and inflammation cell index (c) in Sprague-Dawley (SD) rats are given during epileptogenesis,  
1065 i.e at 7 hours (7H), 1 day (1D), 9 days (9D) post-SE and once epilepsy was chronically installed, i.e. 7  
1066 weeks post-SE (7W) compared to respective controls. In each model (SE-W and SE-J), data from control  
1067 rats have been pooled together during the epileptogenesis period (7H to 9D), after ensuring for no  
1068 statistical difference between these stages. Corresponding number of copies for each gene is given in  
1069 supplementary table S4. When comparing two bars within a same model, the difference is considered  
1070 as statistically significant ( $p < 0.05$ ) when letters (a, b, c, d) above the bars are different (a-b; a-c; a-d;  
1071 b-c; b-d; c-d). Asterisks indicate statistical significance between the two models (SE induced at weaning  
1072 or juvenile stage) at a same post-SE time. The statistical analysis only represents significant differences  
1073 during epileptogenesis. 7H: SE-W, n=7; SE-J, n=6. 1D: SE-W, n=8; SE-J, n=6. 9D: SE-W, n=10; SE-J, n=7.  
1074 7W: SE-W, n=8; SE-J, n=8. CTRL epileptogenesis: CTRL-W, n=10; CTRL-J, n=6. CTRL epilepsy: CTRL-W,  
1075 n=6; CTRL-J, n=6. Bonferroni *post-hoc* analysis following two-way ANOVA: \*\*  $p < 0.01$ , \*\*\*  $p < 0.001$ .  
1076 Abbreviations: SE-W, SE induced at weaning; SE-J, SE induced at juvenile stage

1077

1078 **Fig. 6 Immunohistological detection and identification of round-shaped cells expressing ITGAM**  
1079 **(CD11b) 24 hours post-SE.** (a,b) ITGAM was detected in the dentate gyrus of rats subjected to  
1080 pilocarpine-induced SE at P42 and sacrificed 24 hours later. **a** Orange arrows depict “round-shaped  
1081 cells” within the brain parenchyma, intermingled to activated resident microglial cells. **b** Firm adhesion  
1082 of round-shaped cells to endothelial cells is illustrated. **c** Double fluorescent immunolabeling of ITGAM  
1083 (Green) and CD14 (Red) in the hippocampus shows that almost all ITGAM+ cell infiltrates are  
1084 monocytes/macrophages (CD14+). Scale bars: a,b: 50  $\mu$ m; c: 20  $\mu$ m

1085 **Fig. 7 Heterogeneous distribution of inflammatory markers in the hippocampus of TLE patients can**  
1086 **be modeled by the combination of two complementary models of TLE in rats.** Distribution of the  
1087 values of pro-inflammatory cytokines (IL1 $\beta$ , TNF, IL6), chemokines (MCP1, MIP1 $\alpha$ ), anti-inflammatory  
1088 cytokines (IL4, IL10, IL13), and cellular markers (ITGAM, GFAP) in TLE patients (EPI-PAT) as well as in  
1089 Sprague Dawley (SD) rats at the epileptic stage (7 weeks post-SE) following Pilo-SE induced at weaning  
1090 (EPI-W, n=8) or at the juvenile stage (EPI-J, n=8) and in control SD rats (CTRL, n=12). Box-and-whisker  
1091 plots model the distribution of each value around the median. Mean is represented by black dots.  
1092 Outliers are represented by diamonds. Tukey’s *post-hoc* analysis following one-way ANOVA: \*  $p < 0.05$ ,  
1093 \*\*  $p < 0.01$ , \*\*\*  $p < 0.001$ . Abbreviations: N.D., not detected

1094 **Fig. 8 Indexes of inflammation in resected hippocampus of TLE patients and in epileptic rats.** Pro-  
1095 inflammatory (a) and inflammation cell (b) indexes in TLE patients (EPI-PAT) as well as in Sprague  
1096 Dawley (SD) rats at the epileptic stage (7 weeks post-SE) following Pilo-SE induced at weaning (EPI-W,  
1097 n=8) or at the juvenile stage (EPI-J, n=8) and in control SD rats (CTRL, n=12). Indexes were calculated  
1098 from transcript levels as described in the methods section. Results are expressed as in Fig. 7. Tukey’s  
1099 *post-hoc* analysis following one-way ANOVA: \*\*  $p < 0.01$ , \*\*\*  $p < 0.001$

1100 **Fig. 9 Pro-inflammatory index in resected amygdala of TLE patients compared with the hippocampus.**  
1101 **a** The pro-inflammatory indexes measured in the hippocampus (green bars) and the amygdala (yellow  
1102 bars) have been averaged (red bars) to evaluate the inflammatory status in the whole amygdalo-  
1103 hippocampal complex. **b** Violin plot displaying the pro-inflammatory index distribution of the data  
1104 illustrated in (a). Distribution of each value (black dots) is plotted around the median (dashed line) and  
1105 the 25 and 75 percentiles (dotted lines)

1106 **Fig. 10 Transcript levels of pro-inflammatory cytokines and chemokines after Pilo-SE.** Transcript  
1107 values of pro-inflammatory cytokines (IL1 $\beta$ , TNF, IL6, IFN $\gamma$ ) and chemokines (MCP1, MIP1 $\alpha$ ), during  
1108 epileptogenesis, i.e at 7 hours (7H), 1 day (1D), 9 days (9D) post-SE and once epilepsy was chronically  
1109 installed, i.e. 7 weeks post-SE (7W) compared to respective controls. Results are expressed as in Fig. 5.  
1110 Bonferroni *post-hoc* analysis following two-way ANOVA: \*  $p < 0.05$ , \*\*\*  $p < 0.001$ . Abbreviations: SE-W,  
1111 SE induced at weaning; SE-J, SE in induced at juvenile stage

1112 **Fig. 11 Transcript levels of anti-inflammatory cytokines after pilocarpine-induced SE.** Transcript  
1113 values of anti-inflammatory cytokines (IL4, IL10, IL13), during epileptogenesis, i.e at 7 hours (7H), 1 day  
1114 (1D), 9 days (9D) post-SE and once epilepsy was chronically installed, i.e. 7 weeks post-SE (7W)  
1115 compared to respective controls. Results are expressed as in Fig. 5. Bonferroni *post-hoc* analysis  
1116 following two-way ANOVA: \*  $p < 0.05$ , \*\*\*  $p < 0.001$ . Abbreviations: SE-W, SE induced at weaning; SE-J,  
1117 SE in induced at juvenile stage

1118 **Fig. 12 Inflammation during epilepsy is of low-grade compared to that during epileptogenesis.** Pro-  
1119 inflammatory (a) and anti-inflammatory (b) indexes in Sprague-Dawley (SD) rats were calculated during  
1120 epileptogenesis, i.e at 7 hours (7H), 1 day (1D), 9 days (9D) post-SE and once epilepsy was chronically

1121 installed, i.e. 7 weeks post-SE (7W) compared to respective controls. Results are expressed as in Fig. 5.  
1122 Bonferroni *post-hoc* analysis following two-way ANOVA: \*\*\*  $p < 0.001$ . Abbreviations: SE-W, SE induced  
1123 at weaning; SE-J, SE in induced at juvenile stage

1124 **Fig. 13 RNAscope® ISH of IL1 $\beta$ -mRNA confirms RT-qPCR data and reveals in rats subjected to Pilo-SE**  
1125 **that IL1 $\beta$ -mRNA is mainly expressed by microglia at the peak of inflammation. a** Scatter plot between  
1126 IL1 $\beta$  cDNA copy number measured by RT-qPCR in the hippocampus of TLE patients and the surface  
1127 area occupied by IL1 $\beta$ -transcript signal in sections processed by RNAscope® ISH. Data are obtained  
1128 from the 5 patients, whose resected hippocampi were split in two parts, one reserved for RT-qPCR, the  
1129 other one for histology. Data are significantly correlated and fitted by a linear regression,  $p < 0.0381$ . **b**  
1130 Quantitation of the surface area occupied by IL1 $\beta$ -transcript signal in the granule cell layer of the  
1131 dentate gyrus of rat brain sections processed by RNAscope® ISH (**b1**). Sections were selected at Bregma  
1132 -4.16 mm from rats sacrificed during epileptogenesis (7 hours (7H), 1 day (1D), 9D after SE) or during  
1133 chronic epilepsy (7 weeks (7W) after SE). Statistical analyses showed significant differences between  
1134 the IL1 $\beta$  surface area measured 7H post SE (n=4) and all the other time points (1D: n=5 ; 9D: n=3 ; 7W:  
1135 n=5). Scatter plot (**b2**) between the average IL1 $\beta$  cDNA copy number determined by RT-qPCR in the  
1136 hippocampus of rats sacrificed at the same time points as in B1 (Fig. 10) and the average surface area  
1137 occupied by IL1 $\beta$ -transcript signal measured in sections processed by RNAscope® ISH (**b1**). Data are  
1138 significantly correlated and fitted by a linear regression,  $p < 0.0194$ . (**c-f**) Triple *in situ* hybridization of  
1139 IL1 $\beta$  together with ITGAM (**c-d**) and GFAP (**e-f**) transcripts using RNAscope® technology, in the dentate  
1140 gyrus of the rat hippocampus 7 hours (peak of inflammation; Fig. 10) after SE induced at 42 days. To  
1141 facilitate the visualization of IL1 $\beta$  in microglia and astrocytes, we used two colors providing the best  
1142 contrasts, and thus assigned magenta to IL1 $\beta$  and green either to ITGAM (microglia) or GFAP  
1143 (astrocytes). Colocation is displayed in white when magenta and green are superimposed. In this area,  
1144 the largest amount of IL1 $\beta$  transcript is colocalized with ITGAM+ cells (**c-d**), compared to astrocytes (**e-**  
1145 **f**). Confocal microscope images are magnified at 63X. Scale bars: C and E: 50  $\mu\text{m}$ ; D and F: 25  $\mu\text{m}$

1146 **Table 1 Clinical characteristics of TLE patients from group 1 (G1: P01-P17), group 2 (G2: P18-P29) and**  
1147 **group 3 (G3: P40-P49).** Data not shown in the table were not available in the patients' medical record.  
1148 Neuronal loss and reactive gliosis scoring: 0: not present; 1: mild; 2: moderate; 3: severe.  
1149 Abbreviations: N: normal; HS: *hippocampal sclerosis*; AB: amyloid bodies; N.A.: pathology report not  
1150 available; NL: neuronal loss; O: oedema; RG: reactive gliosis. Anti-epileptic drugs (AEDs): CLZ:  
1151 clonazepam; CBZ: carbamazepine; GBP: gabapentin; LEV: levetiracetam; LCS: lacosamide; LTG:  
1152 lamotrigine; OXC: oxcarbazepine; PB: phenobarbital; PHT: phenytoin; PGB: pregabalin; TPM:  
1153 topiramate; URB: urbanil; VGB: vigabatrin; VPA: valproate; ZNS: zonisamide

1154 **Table 2 Number of cDNA copies (mean  $\pm$  SEM) after reverse transcription in the resected**  
1155 **hippocampus of patients with refractory epilepsy (n = 22).** P41 and P49 patients have been chosen  
1156 for exemplification, as they present with the lowest and the highest values of the pro-inflammatory  
1157 index (Figure 3), respectively

1158 **Table 3 Blood cells do not contribute significantly to the inflammatory markers detected in brain.**  
1159 Transcript level quantitation was performed in the hippocampus of control rats or epileptic rats 7h  
1160 after SE, after transcatheterial perfusion of 0.9% NaCl or not. Brains were dissected immediately after  
1161 death (CTRL-blood: n=5 ; SE-blood: n=5; CTRL-NaCl: n=5 ; SE-NaCl: n=4). NS: statistically not significant

1162 **Table 4 Fold-changes in inflammatory markers between epileptogenesis and epilepsy in rats.** For  
1163 each molecular marker included in the pro-inflammatory index (i.e IL1 $\beta$ , IL6, TNF $\alpha$ , IGNG $\gamma$ , MCP1,

1164 MIP1 $\alpha$ ), the highest value of cDNA copy number measured during the epileptogenesis phase was  
1165 compared to the value measured during the chronic phase of epilepsy (7 weeks post-SE) in rats whose  
1166 SE was induced at P21 or at P42. Fold difference between epileptogenesis and epilepsy was calculated.  
1167 Statistical difference was determined with Student's *t*-test: \*  $p < 0.05$ , \*\*  $p < 0.01$ , \*\*\*  $p < 0.001$

## 1168 10 | SUPPLEMENTARY MATERIAL

1169 **Fig. S1 Non-overlapping of GFAP immunofluorescent labelling obtained with two different**  
1170 **antibodies.** Double immunohistochemical labelling of GFAP in the hippocampus (a) and in the piriform  
1171 cortex (b) of a rat 7 weeks after pilocarpine-induced SE. The rabbit polyclonal anti-GFAP antibody  
1172 (AB5804; Chemicon) is visualized in green while the mouse monoclonal anti-GFAP antibody (G3893;  
1173 Sigma-Aldrich) is visualized in red. Colocalization is displayed in yellow when red and green are  
1174 superimposed. These observations suggest that GFAP epitopes recognized by the two antibodies are  
1175 not accessible (or present) in the same manner within the same structure or between two different  
1176 structures. Scale bar: 50  $\mu\text{m}$

1177 **Fig. S2 Index of housekeeping genes (HSKG) in resected tissue from TLE patients.** HSKG index in  
1178 resected hippocampus (a) and amygdala (b) of each TLE patient (n=22). Indexes were calculated by  
1179 integrating transcript levels of DMD, GAPDH and HPRT1 housekeeping genes. (c) Fold-difference of  
1180 HSKG index between the amygdala and the hippocampus is given for each patient

1181 **Fig. S3 The normalization techniques used in RT-qPCR can modify the results.** Comparison of the pro-  
1182 inflammatory index (PI-I) values for each patient after unbiased normalization with the SmRNA (filled  
1183 bars) or after normalization with housekeeping genes (dotted bars) in the hippocampus (a) and the  
1184 amygdala (b)

1185 **Fig. S4 Evolution of glial cell activation in the hippocampus after Pilo-SE.** Immunofluorescence  
1186 detection was performed in the rat hippocampus using specific antibodies  
1187 directed against ITGAM (CD11b) for microglia/macrophages (magenta) and GFAP for astrocytes  
1188 (green). Nuclei were counterstained with DAPI. For GFAP, the rabbit polyclonal anti-GFAP antibody was  
1189 used (AB5804; Chemicon). Different stages of epileptogenesis (SE-1D: 1-day post-SE; SE-9D: 9 days  
1190 post-SE) or chronic epilepsy (SE-7W: 7 weeks post-SE) after Pilo-SE induced at weaning (P21) or at  
1191 juvenile age (P42) are compared to their respective controls. Scale bar: 500  $\mu\text{m}$

1192 **Fig. S5 Increased expression of representative genes of the interleukin 1 system (IL1 $\beta$ , IL1R1, IL1RA)**  
1193 **in the hippocampus of epileptic rats is dependent of the age at which SE is induced. a-b:**  
1194 Immunohistochemical labeling of IL1 $\beta$  in the molecular layer of the hippocampus of Sprague-Dawley  
1195 rats at the epileptic stage (7 weeks post-Pilo-SE; EPI 7W) after SE induced at juvenile age (a2, a3) or at  
1196 weaning (b2, b3) and compared to their respective controls (CTRL 7W; a1, b1). IL1 $\beta$  protein is clearly  
1197 detected in the hippocampus of epileptic rats subjected to SE at the juvenile stage. c-d: Transcript  
1198 levels of IL1R1 (c, interleukin 1 receptor) and IL1RA (d, interleukin 1 receptor antagonist) were  
1199 quantified once epilepsy was chronically installed, i.e. 7 weeks post-SE (EPI-W, n=8; EPI-J, n=8)  
1200 compared to respective controls. Green asterisks indicate statistical significance between the two  
1201 models (SE induced at weaning or juvenile stage), black asterisks indicate statistical significance  
1202 between CTRL and SE. For IL1R1 in the EPI-J model, the statistical difference between CTRL and SE was  
1203  $p = 0.0723$ . Bonferroni *post-hoc* analysis following two-way ANOVA: \*\*  $p < 0.01$ , \*\*\*  $p < 0.001$ .  
1204 Abbreviations: EPI-W, SE induced at weaning; EPI-J, SE in induced at juvenile stage. Scale bar: 50  $\mu\text{m}$

1205 **Fig. S6 RNAscope<sup>®</sup> ISH of IL1 $\beta$ -mRNA in resected hippocampus from TLE patients corroborates data**  
1206 **obtained in the same hippocampus by RT-qPCR.** RNAscope<sup>®</sup> ISH of IL1 $\beta$ -mRNA (a, magenta) was

1207 detected together with ITGAM (CD11b)-mRNA (**b**, green) or GFAP-mRNA (**c**, green) in the resected  
1208 hippocampus of TLE patients. Two patients are represented (P15 and P42) and the respective IL1 $\beta$ -  
1209 cDNA copy numbers measured by RT-qPCR are provided. As shown by the white arrows, IL1 $\beta$ -mRNA  
1210 appears to be located in cells bearing morphological features of glial cells. Scale bar: 50  $\mu$ m

1211 **Fig. S7 RNAscope® ISH of IL1 $\beta$ , ITGAM and GFAP transcripts in the dentate gyrus of rats after Pilo-SE**  
1212 **at 42 days.** Triple ISH of IL1 $\beta$  (**a**), ITGAM (CD11b) (**b**) and GFAP (**c**) transcripts using RNAscope®  
1213 technology is depicted in the rat dentate gyrus. Nuclei were counterstained with DAPI. Different stages  
1214 of epileptogenesis (SE-7H: 7 hours post-SE; SE-9D: 9 days post-SE) or chronic epilepsy (EPI-7W: 7 weeks  
1215 post-SE) after Pilo-SE at juvenile age (P42) are compared to their respective controls (CTRL 7H/9D and  
1216 CTRL 7W). Scale bar: 50  $\mu$ m

1217 **Table S1 Primer sequences – *Homo sapiens sapiens*.** Abbreviations: DMD: Dystrophin ; GAPDH:  
1218 Glyceraldehyde 3-phosphate dehydrogenase ; HPRT1: Hypoxanthine Phosphoribosyltransferase 1 ;  
1219 IL1 $\beta$ : Interleukin 1 beta ; IL6: Interleukin 6; TNF: Tumor necrosis factor ; IFN $\gamma$ : Interferon gamma ;  
1220 MCP1: Monocyte chemoattractant protein 1 ; MIP1 $\alpha$ : Macrophage Inflammatory Protein alpha ; IL4:  
1221 Interleukin 4 ; IL10: Interleukin 10 ; IL13: Interleukin 13 ; GFAP: Glial fibrillary acidic protein ; ITGAM:  
1222 Integrin alpha M

1223 **Table S2 Primer sequences – *Rattus Norvegicus*.** Abbreviations: As in Table S1; IL1R1: Interleukin 1  
1224 Receptor Type 1 ; IL1RA : Interleukin-1 receptor antagonist

1225 **Table S3 Individual values of TLE patients for molecular and cellular markers of inflammation**  
1226 **measured in the hippocampus.** Transcript level of pro-inflammatory cytokines (IL1 $\beta$ , IL6, TNF),  
1227 chemokines (MCP1, MIP1 $\alpha$ ), anti-inflammatory cytokine IL10, and cell markers (GFAP, ITGAM) were  
1228 measured in resected hippocampus of TLE patients (n=22). Individual values are expressed in percent  
1229 of the mean value for each marker

1230 **Table S4 Number of cDNA copies (mean  $\pm$  SEM) in control rat hippocampus after reverse**  
1231 **transcription of total RNA**

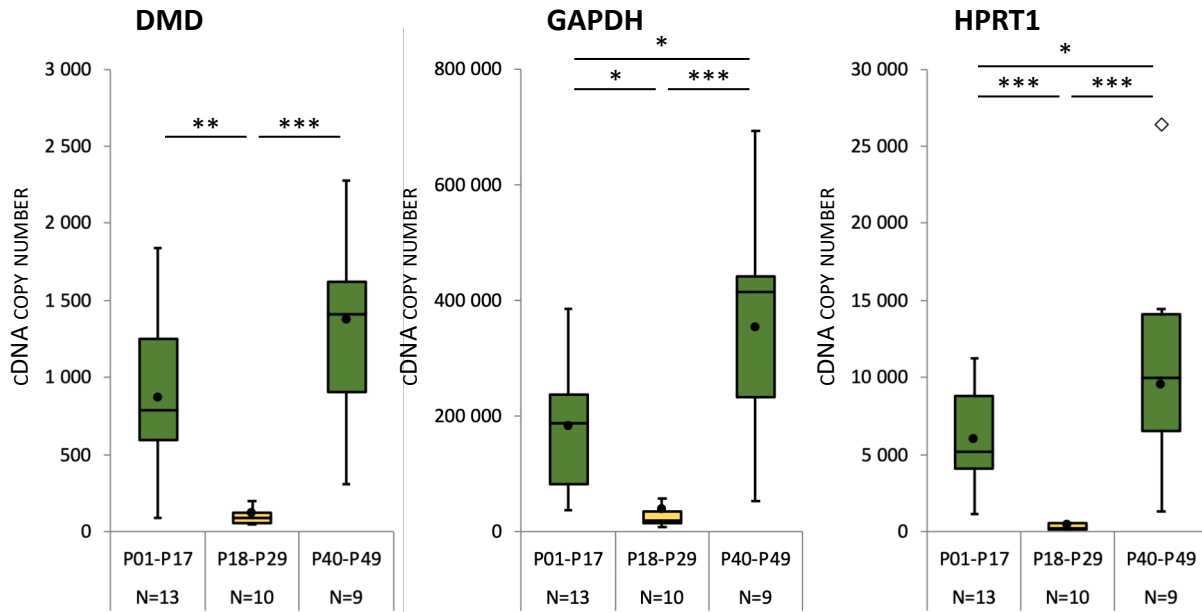

**Fig. 1 Delayed cryopreservation of human brain tissue significantly alters transcript levels of housekeeping genes.** Hippocampus from 3 groups of TLE patients were resected surgically and frozen in liquid nitrogen during the 5 minutes (Group 1: P01-P17; Group 3: P40-P49; green box and whisker plots) or 45 to 90 minutes (Group 2; P18-P29 group, yellow box and whiskers plot) after resection. Transcript levels of three housekeeping genes (DMD, GAPDH and HPRT1) were quantified. Box-and-whisker plots model the distribution of each value around the median of the cDNA copy number measured by RT-qPCR. Mean is represented by black dots. Outliers are represented by diamonds. Tukey's *post-hoc* analysis following one-way ANOVA: \*  $p < 0.05$ , \*\*  $p < 0.01$ , \*\*\*  $p < 0.001$ .

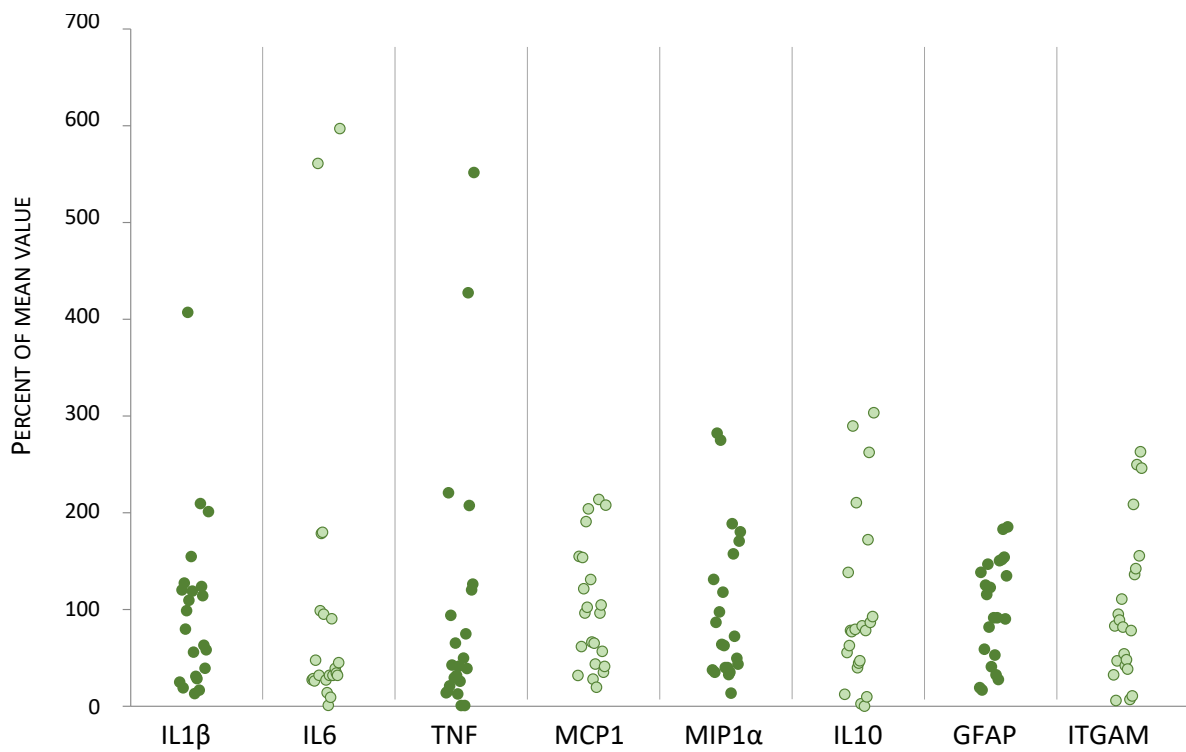

**Fig. 2 Patients with TLE are heterogeneously distributed regarding the molecular and cellular markers of inflammation measured in the hippocampus.** Transcript level of pro-inflammatory cytokines (IL1 $\beta$ , IL6, TNF), chemokines (MCP1, MIP1 $\alpha$ ), anti-inflammatory cytokine IL10, and cellular markers (GFAP for astrocytes, ITGAM for microglia/macrophages) were measured in resected hippocampus of TLE patients (n=22). Each point represents a patient, and individual values are expressed in percent of the mean value for each marker.



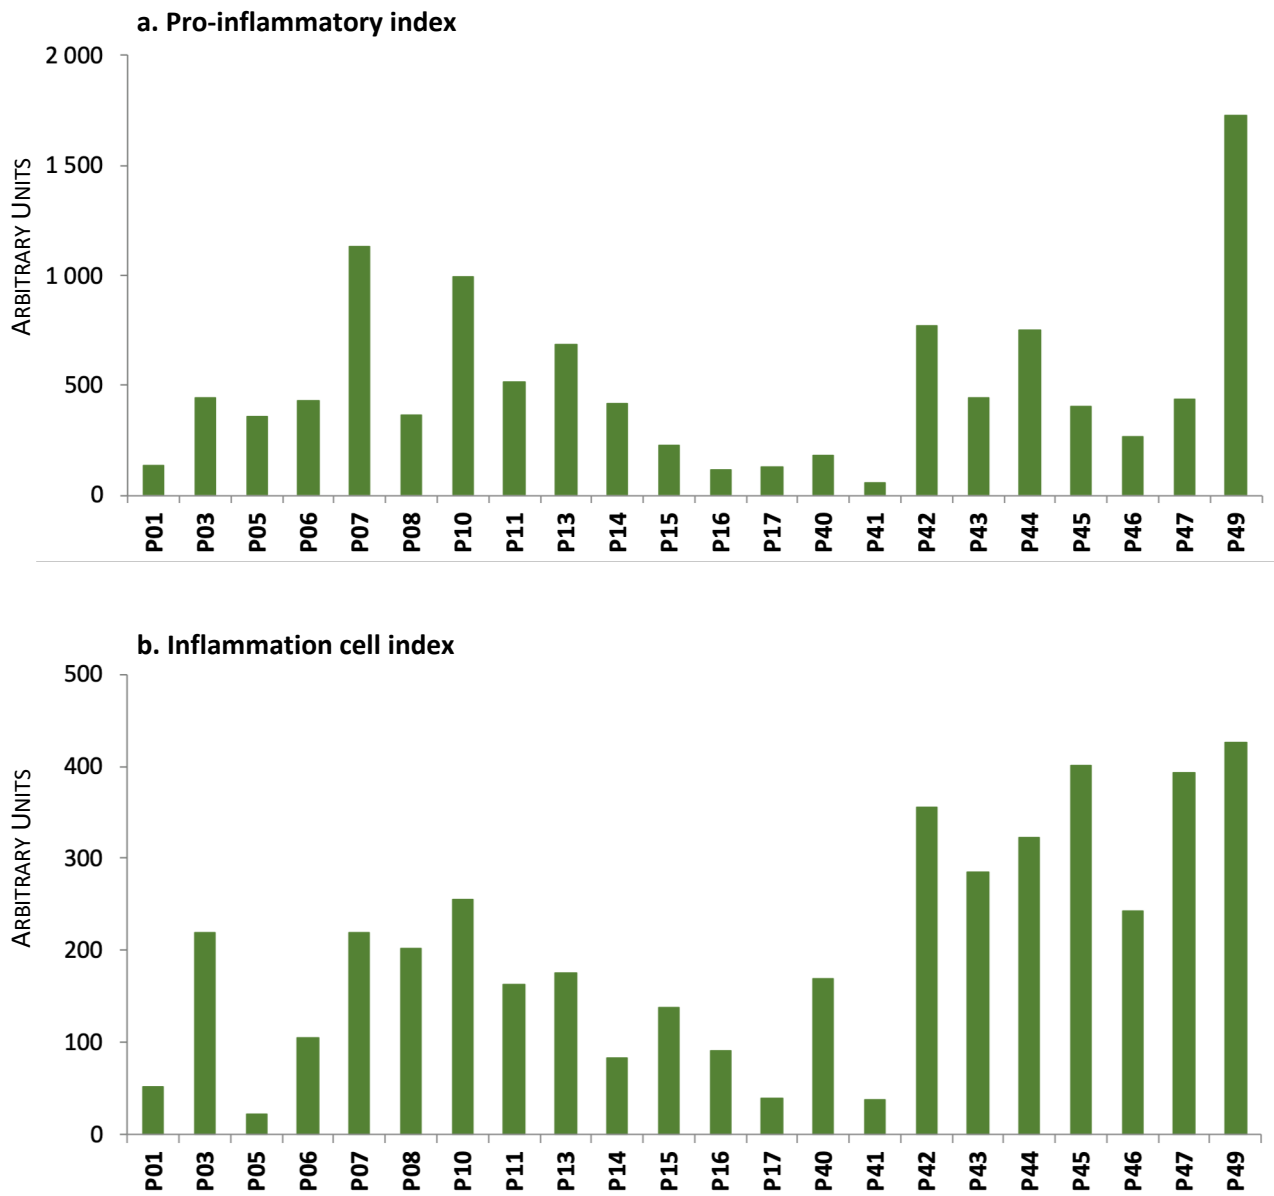

**Fig. 3 Individual inflammatory indexes in the hippocampus of TLE patients.** Distribution of the values of pro-inflammatory index (a), and inflammation cell index (b) in resected hippocampus of TLE patients (n=22). Indexes were calculated from transcript levels as described in the methods section.

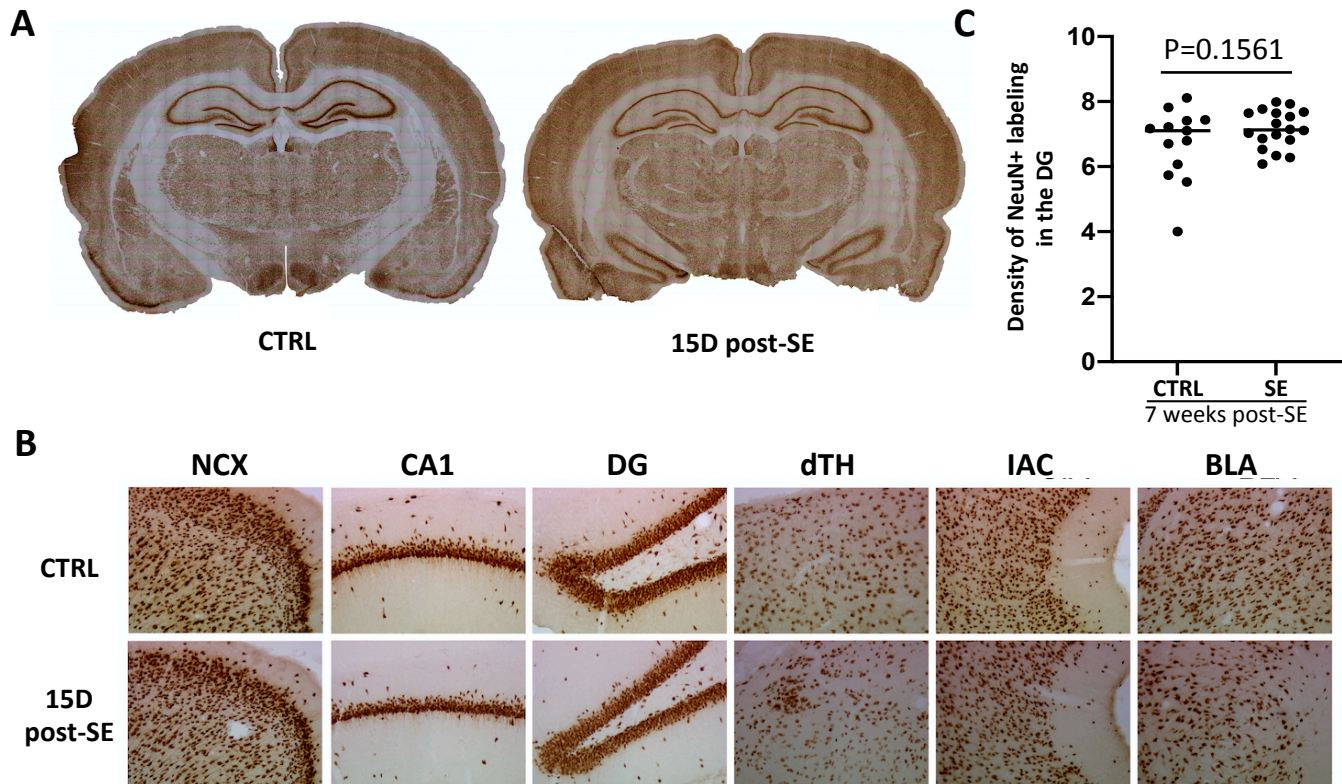

**Fig. 4 Absence of massive neurodegeneration in the brain of Sprague-Dawley rats after Pilo-SE induced at weaning.** **a** Illustration of NeuN-immunolabeling at 36 days of age, in a control rat and in a rat subjected to SE 15 days earlier (P21). **b** Enlarged observations of NeuN-immunolabeling in brain regions of the sections presented in **(a)**. Note that these regions are usually affected by massive neurodegeneration when SE is induced at P42 (Nadam et al., 2007; Sanchez et al., 2009). **c** Quantification of the surface area occupied by NeuN-immunolabeling in the DG, 7 weeks post-SE (CTRL, n=13 sections from 5 rats; SE, n= 18 sections from 6 rats). Abbreviations: BLA, basolateral nucleus of the amygdala; D, day; DG, dentate gyrus; dTH, dorsal thalamus; IAC, insular agranular cortex; NCX, neocortex.

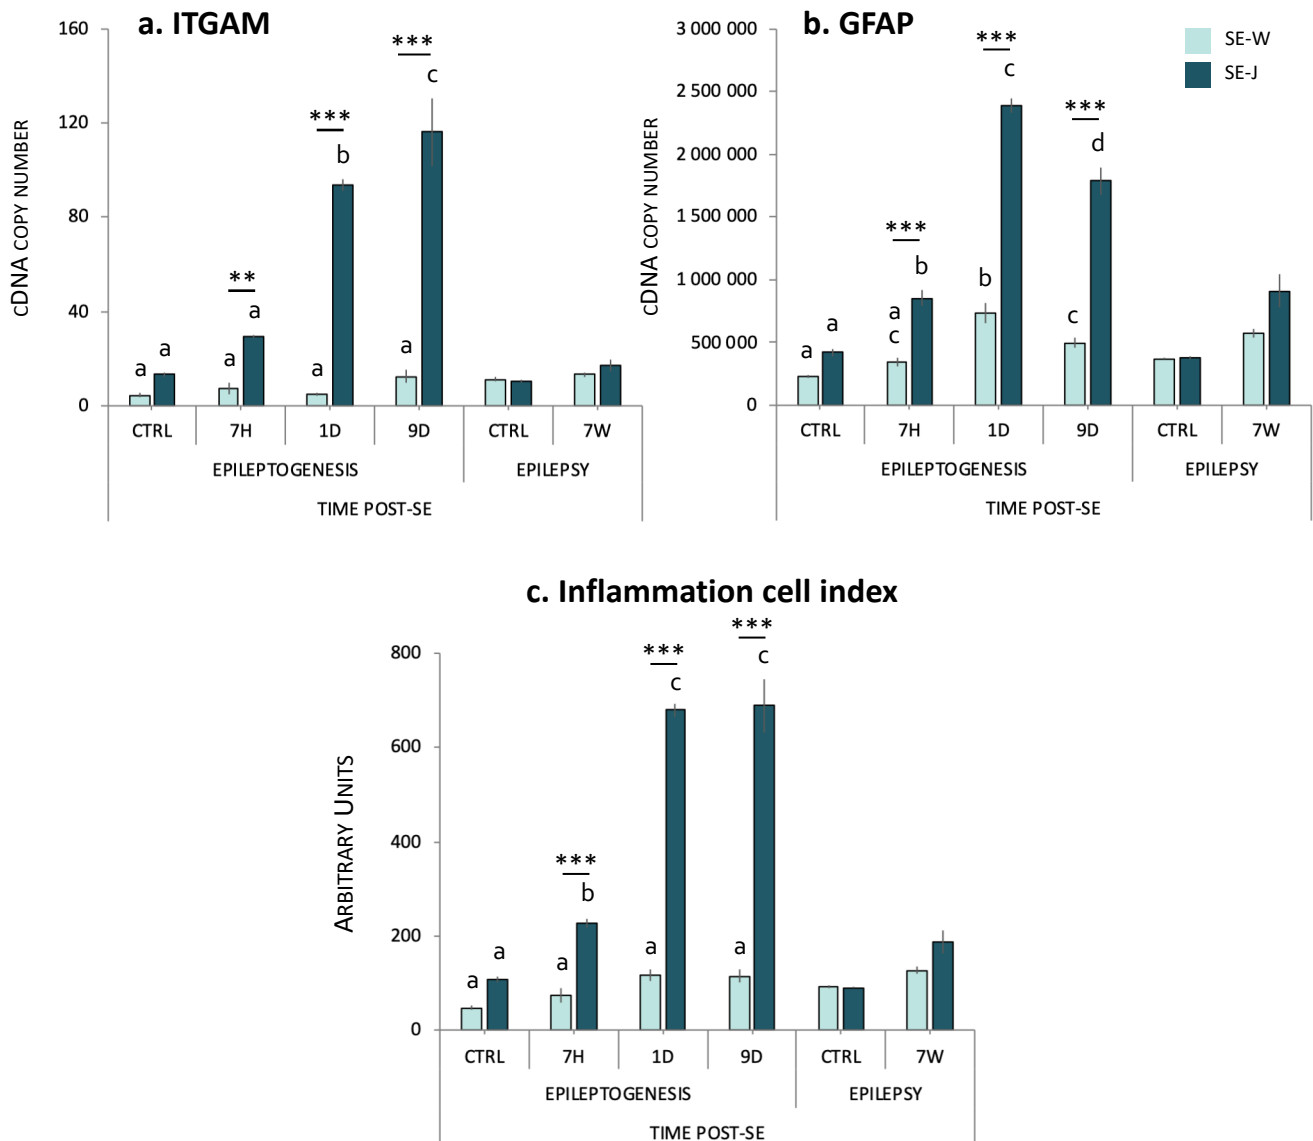

**Fig. 5 Expression of cell markers (ITGAM and GFAP) after Pilo-SE.** Transcript values of ITGAM (a) and GFAP (b) and inflammation cell index (c) in Sprague-Dawley (SD) rats are given during epileptogenesis, i.e at 7 hours (7H), 1 day (1D), 9 days (9D) post-SE and once epilepsy was chronically installed, i.e. 7 weeks post-SE (7W) compared to respective controls. In each model (SE-W and SE-J), data from control rats have been pooled together during the epileptogenesis period (7H to 9D), after ensuring for no statistical difference between these stages. Corresponding number of copies for each gene is given in supplementary table S4. When comparing two bars within a same model, the difference is considered as statistically significant ( $p < 0.05$ ) when letters (a, b, c, d) above the bars are different (a-b; a-c; a-d; b-c; b-d; c-d). Asterisks indicate statistical significance between the two models (SE induced at weaning or juvenile stage) at a same post-SE time. The statistical analysis only represents significant differences during epileptogenesis. 7H: SE-W, n=7; SE-J, n=6. 1D: SE-W, n=8; SE-J, n=6. 9D: SE-W, n=10; SE-J, n=7. 7W: SE-W, n=8; SE-J, n=8. CTRL epileptogenesis: CTRL-W, n=10; CTRL-J, n=6. CTRL epilepsy: CTRL-W, n=6; CTRL-J, n=6. Bonferroni *post-hoc* analysis following two-way ANOVA: \*\*  $p < 0.01$ , \*\*\*  $p < 0.001$ . Abbreviations: SE-W, SE induced at weaning; SE-J, SE induced at juvenile stage.

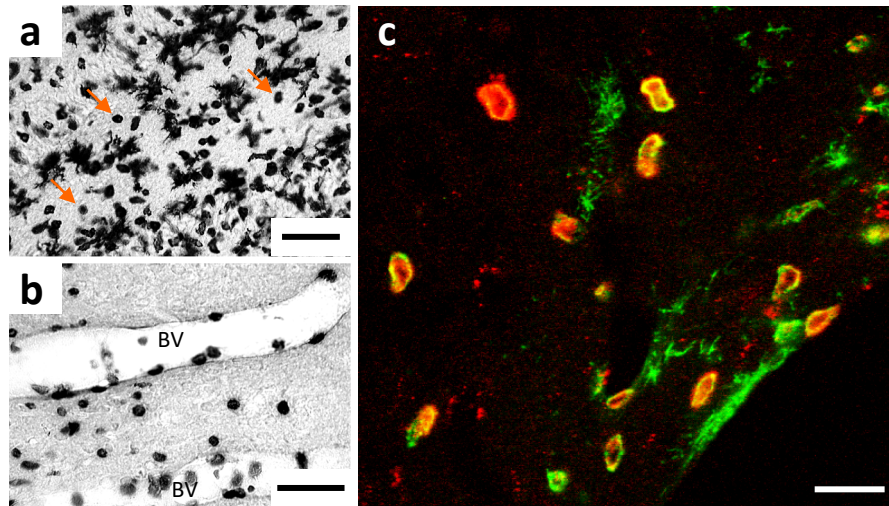

**Fig. 6 Immunohistological detection and identification of round-shaped cells expressing ITGAM (CD11b) 24 hours post-SE.** (a,b) ITGAM was detected in the dentate gyrus of rats subjected to pilocarpine-induced SE at P42 and sacrificed 24 hours later. **a** Orange arrows depict “round-shaped cells” within the brain parenchyma, intermingled to activated resident microglial cells. **b** Firm adhesion of round-shaped cells to endothelial cells is illustrated. **c** Double fluorescent immunolabeling of ITGAM (Green) and CD14 (Red) in the hippocampus shows that almost all ITGAM+ cell infiltrates are monocytes/macrophages (CD14+). Scale bars: a,b: 50  $\mu$ m; c: 20  $\mu$ m.

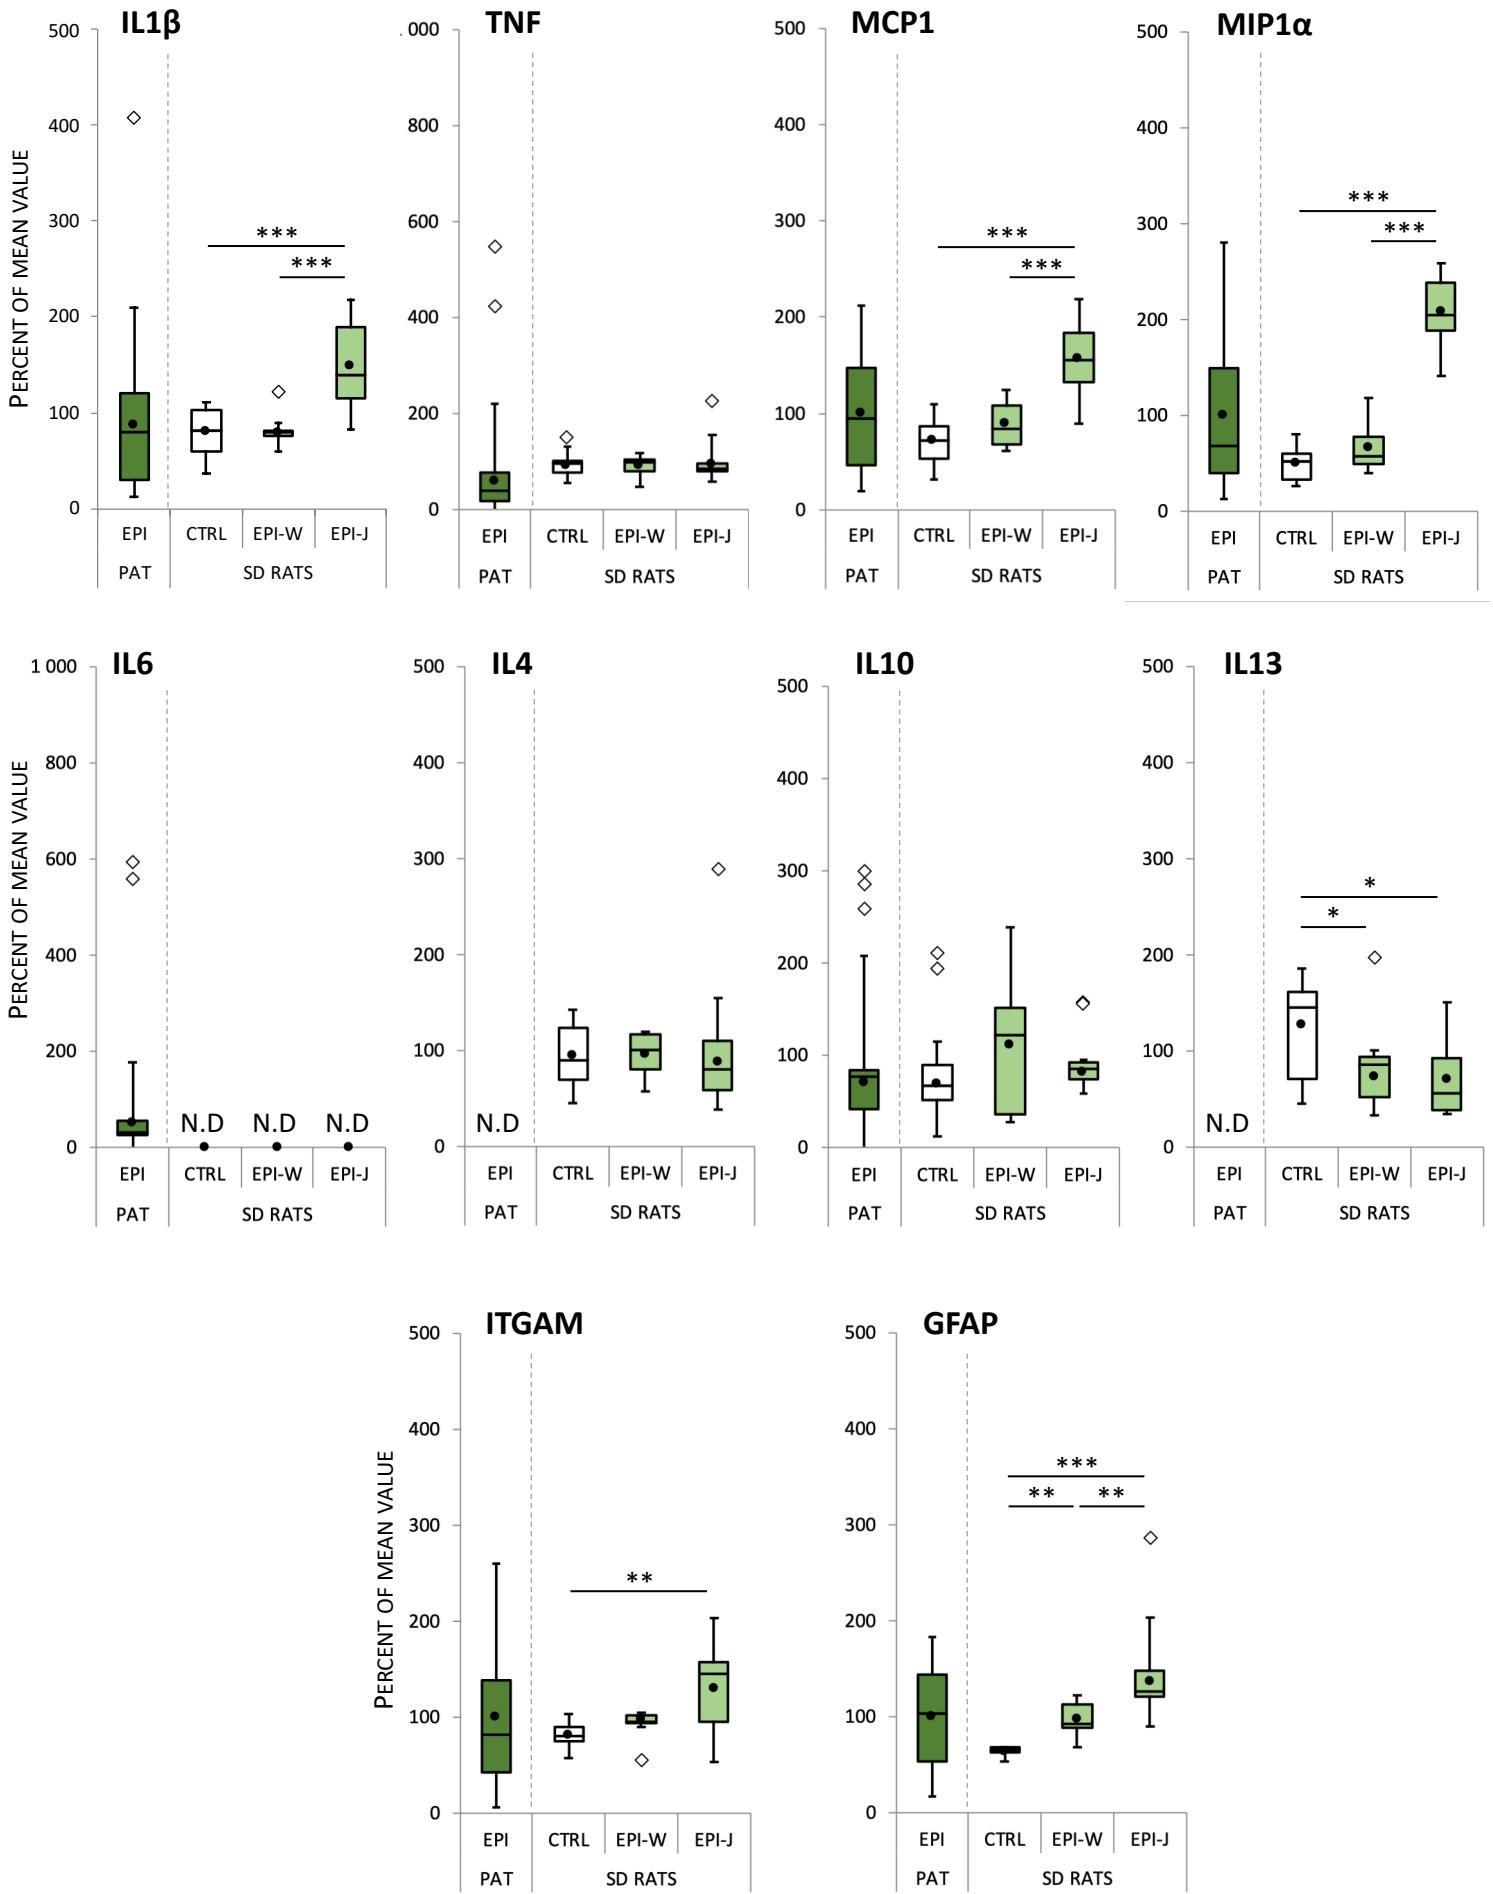

**Fig. 7 Heterogeneous distribution of inflammatory markers in the hippocampus of TLE patients can be modeled by the combination of two complementary models of TLE in rats.** Distribution of the values of pro-inflammatory cytokines (IL1 $\beta$ , TNF, IL6), chemokines (MCP1, MIP1 $\alpha$ ), anti-inflammatory cytokines (IL4, IL10, IL13), and cellular markers (ITGAM, GFAP) in TLE patients (EPI-PAT) as well as in Sprague Dawley (SD) rats at the epileptic stage (7 weeks post-SE) following Pilo-SE induced at weaning (EPI-W, n=8) or at the juvenile stage (EPI-J, n=8) and in control SD rats (CTRL, n=12). Box-and-whisker plots model the distribution of each value around the median. Mean is represented by black dots. Outliers are represented by diamonds. Tukey's *post-hoc* analysis following one-way ANOVA: \*  $p < 0.05$ , \*\*  $p < 0.01$ , \*\*\*  $p < 0.001$ . Abbreviations: N.D., not detected.

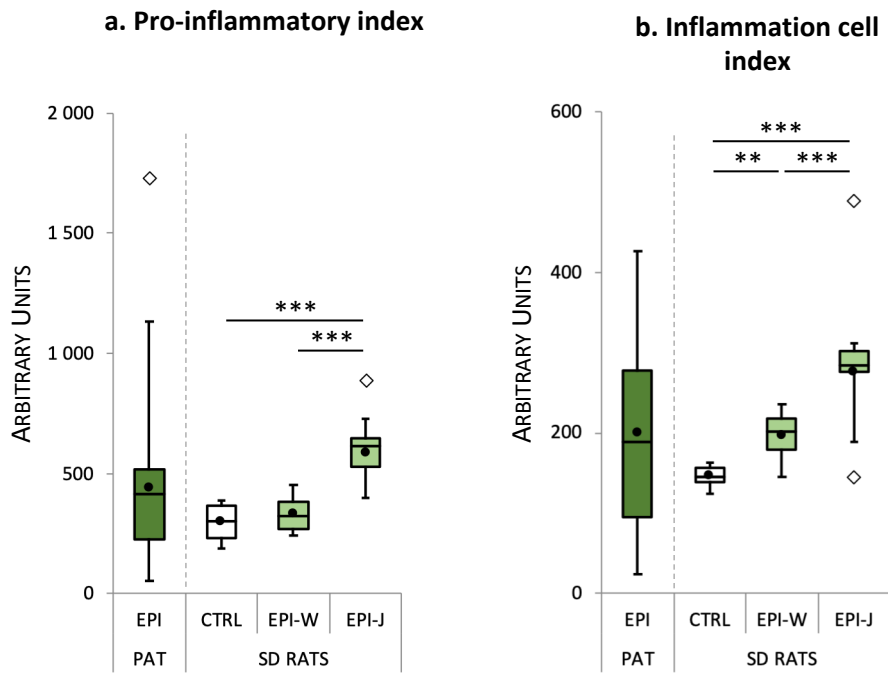

**Fig. 8** Indexes of inflammation in resected hippocampus of TLE patients and in epileptic rats. Pro-inflammatory (a) and inflammation cell (b) indexes in TLE patients (EPI-PAT) as well as in Sprague Dawley (SD) rats at the epileptic stage (7 weeks post-SE) following Pilo-SE induced at weaning (EPI-W, n=8) or at the juvenile stage (EPI-J, n=8) and in control SD rats (CTRL, n=12). Indexes were calculated from transcript levels as described in the methods section. Results are expressed as in Fig. 7. Tukey's *post-hoc* analysis following one-way ANOVA: \*\*  $p < 0.01$ , \*\*\*  $p < 0.001$ .

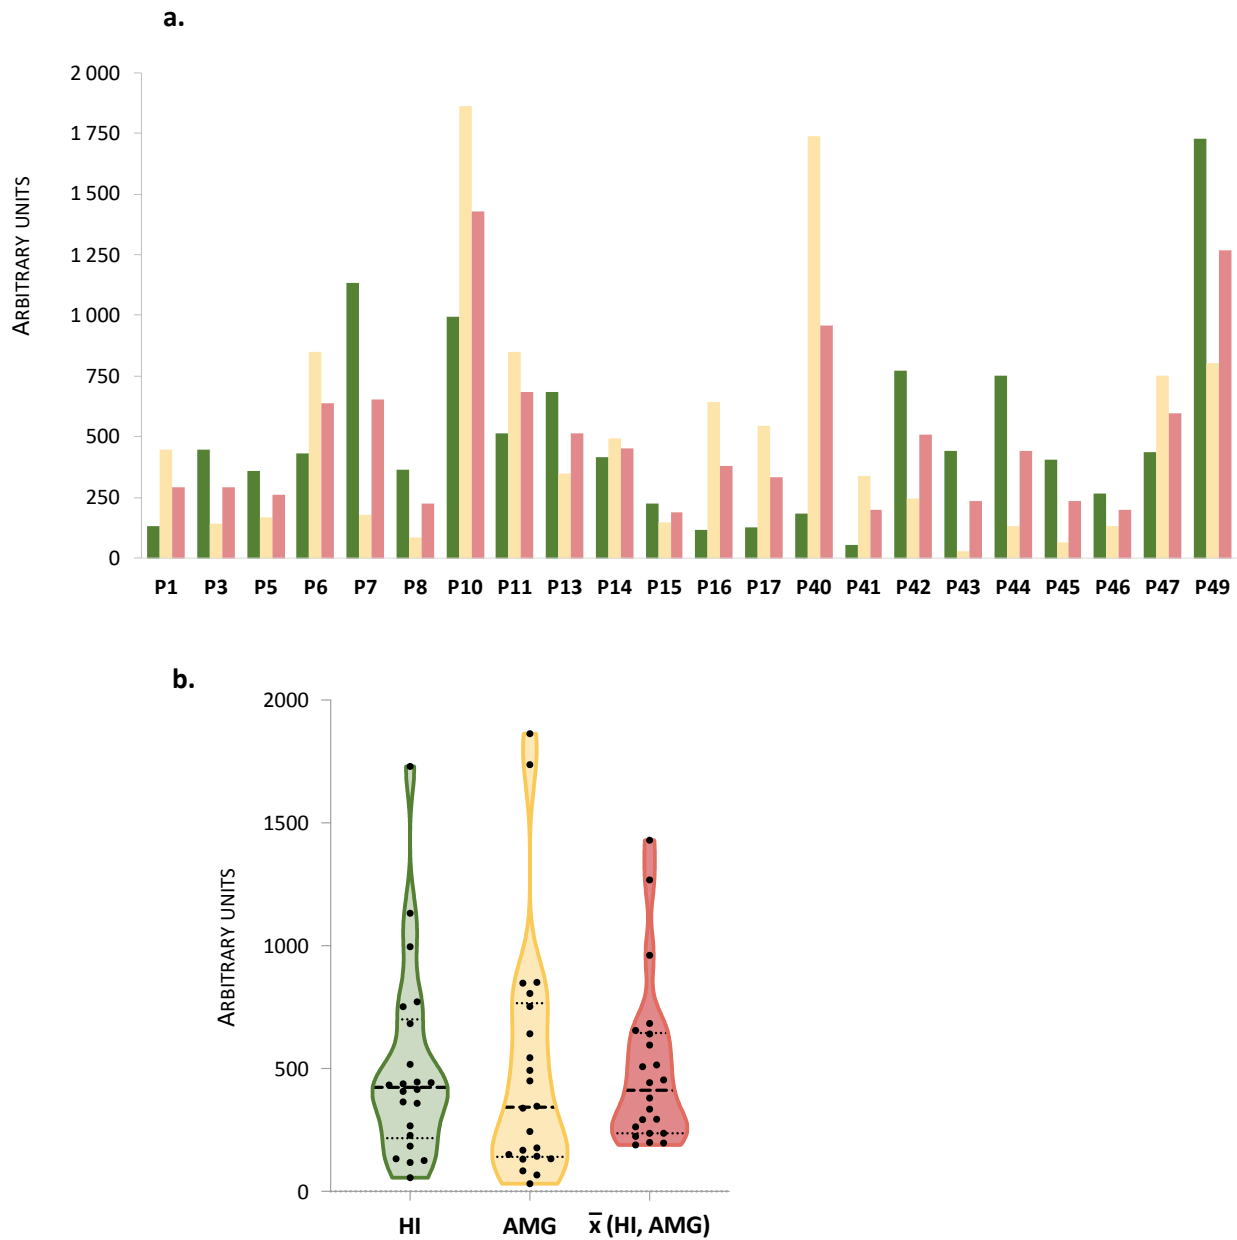

**Fig. 9 Pro-inflammatory index in resected amygdala of TLE patients compared with the hippocampus.** **a** The pro-inflammatory indexes measured in the hippocampus (green bars) and the amygdala (yellow bars) have been averaged (red bars) to evaluate the inflammatory status in the whole amygdalo-hippocampal complex. **b** Violin plot displaying the pro-inflammatory index distribution of the data illustrated in (a). Distribution of each value (black dots) is plotted around the median (dashed line) and the 25 and 75 percentiles (dotted lines).



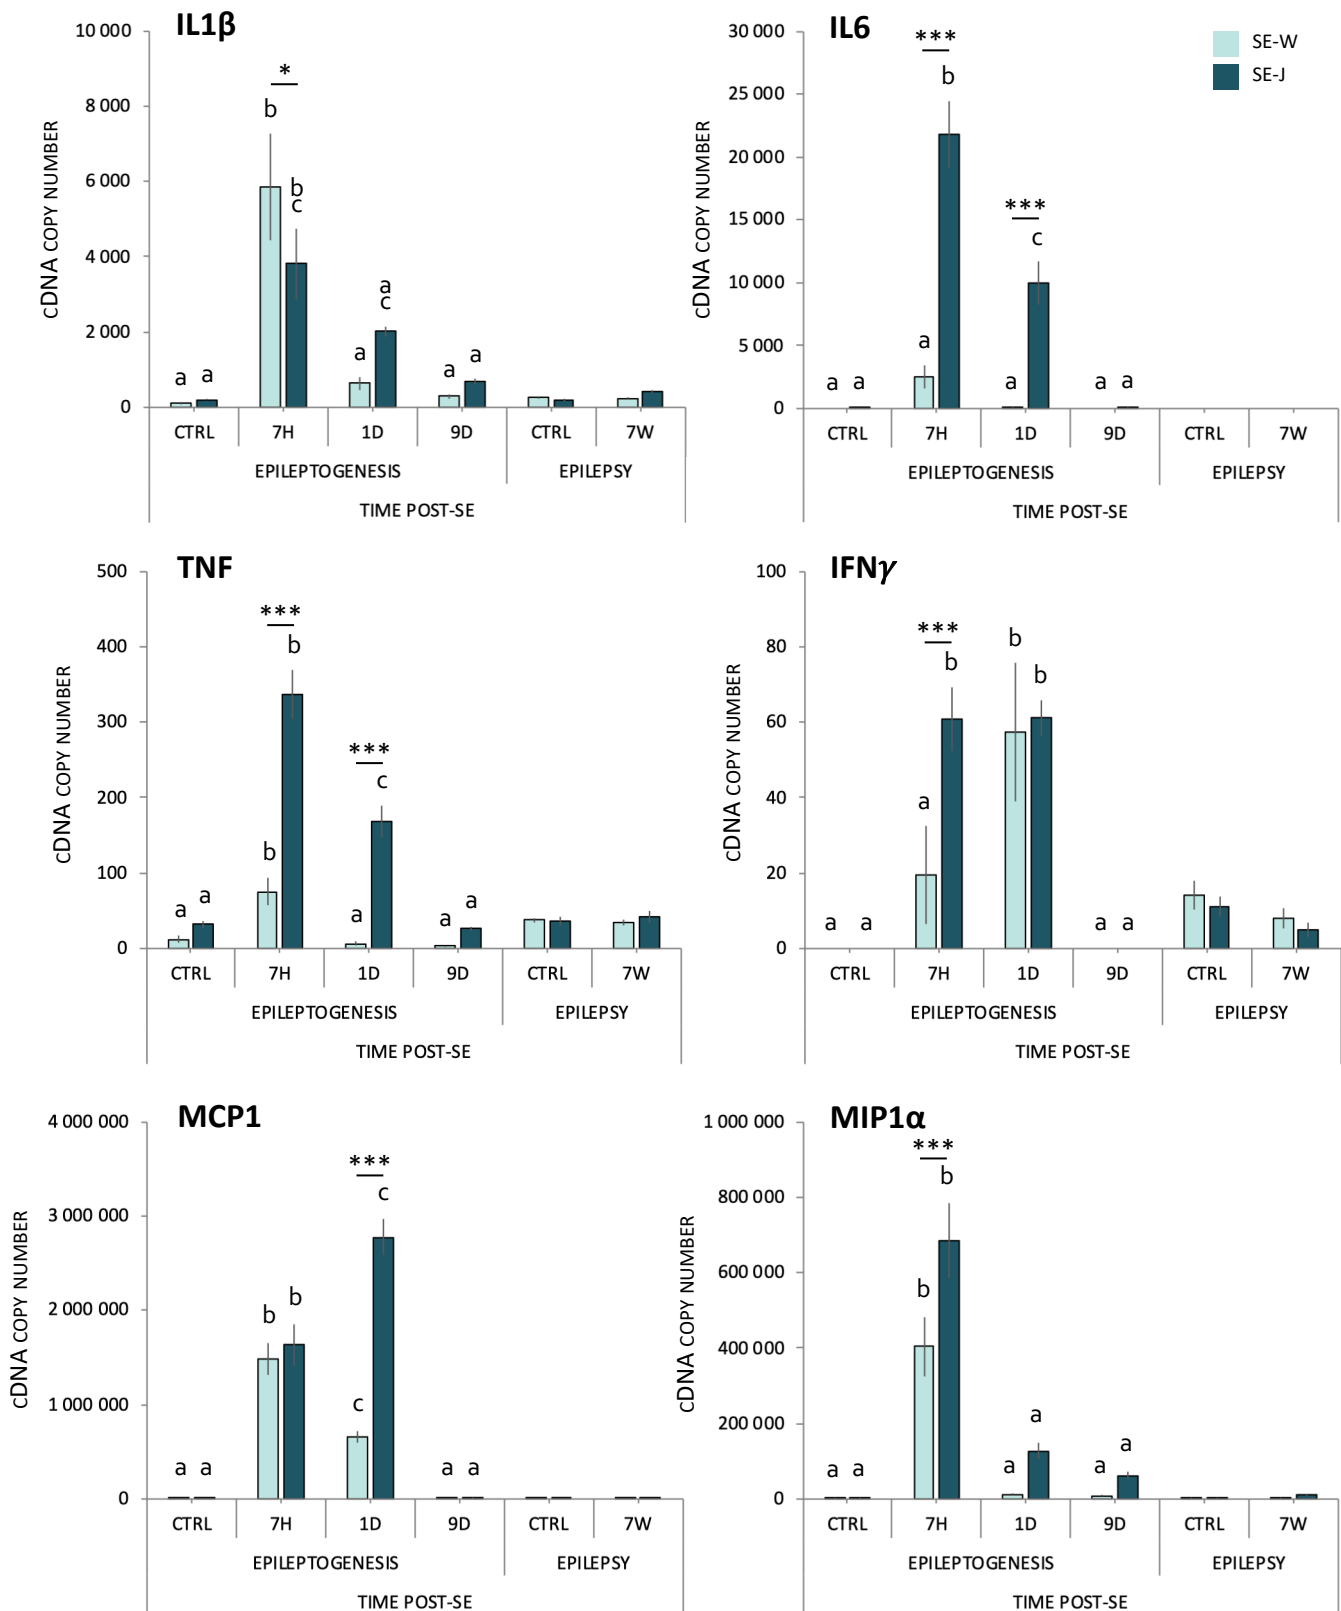

**Fig. 10 Transcript levels of pro-inflammatory cytokines and chemokines after Pilo-SE.** Transcript values of pro-inflammatory cytokines (IL1β, TNF, IL6, IFNγ) and chemokines (MCP1, MIP1α), during epileptogenesis, i.e. at 7 hours (7H), 1 day (1D), 9 days (9D) post-SE and once epilepsy was chronically installed, i.e. 7 weeks post-SE (7W) compared to respective controls. Results are expressed as in Fig. 5. Bonferroni *post-hoc* analysis following two-way ANOVA: \*  $p < 0.05$ , \*\*\*  $p < 0.001$ . Abbreviations: SE-W, SE induced at weaning; SE-J, SE induced at juvenile stage.

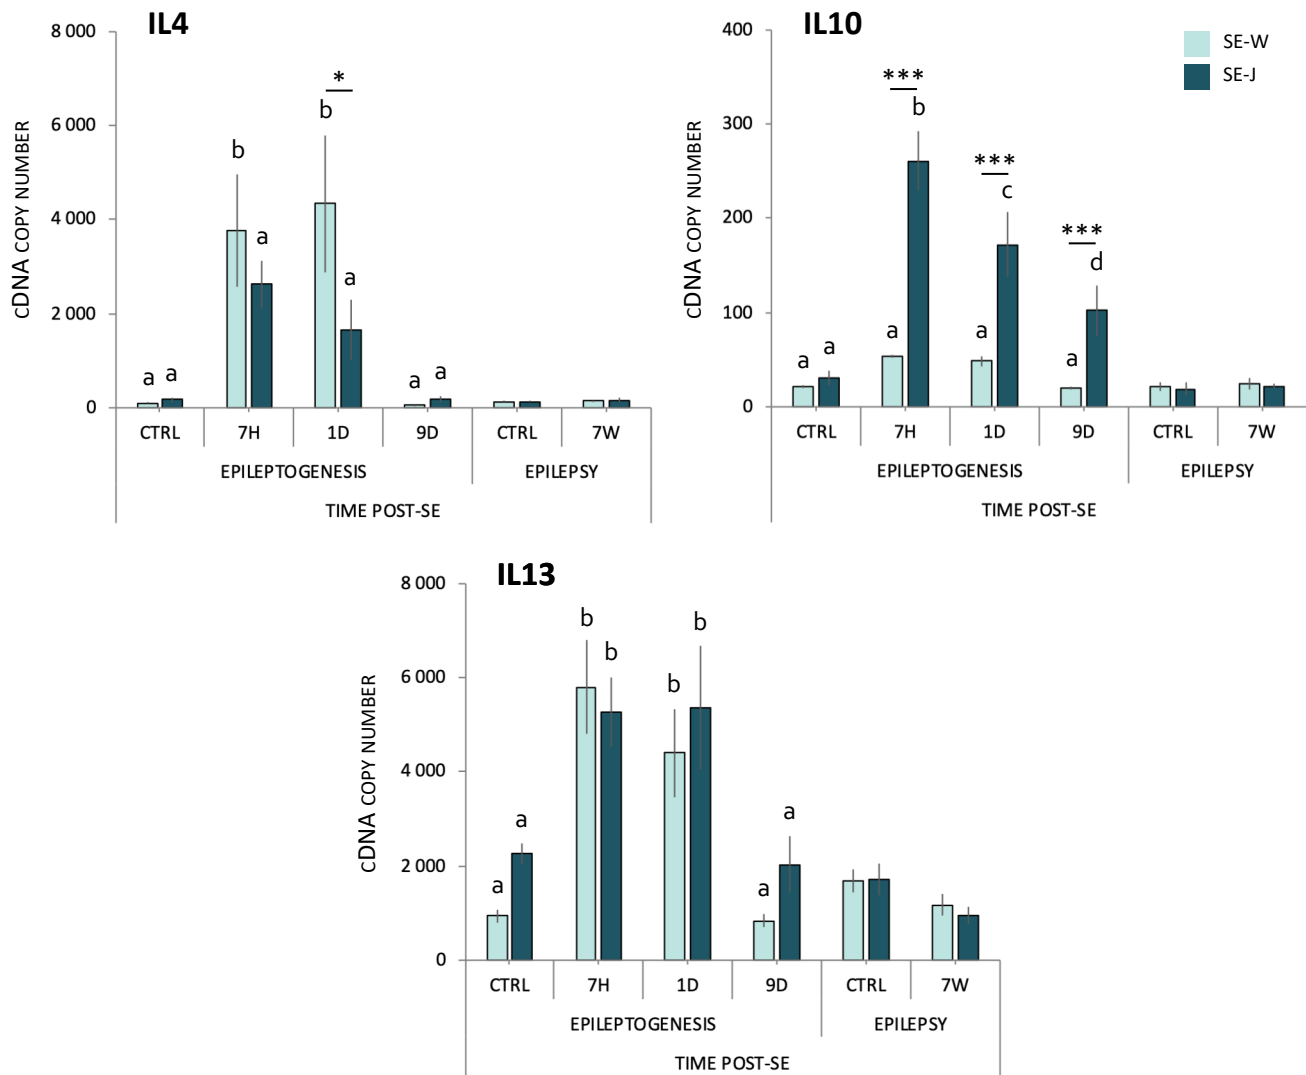

**Fig. 11 Transcript levels of anti-inflammatory cytokines after pilocarpine-induced SE.** Transcript values of anti-inflammatory cytokines (IL4, IL10, IL13), during epileptogenesis, i.e at 7 hours (7H), 1 day (1D), 9 days (9D) post-SE and once epilepsy was chronically installed, i.e. 7 weeks post-SE (7W) compared to respective controls. Results are expressed as in Fig. 5. Bonferroni *post-hoc* analysis following two-way ANOVA: \*  $p < 0.05$ , \*\*\*  $p < 0.001$ . Abbreviations: SE-W, SE induced at weaning; SE-J, SE in induced at juvenile stage.

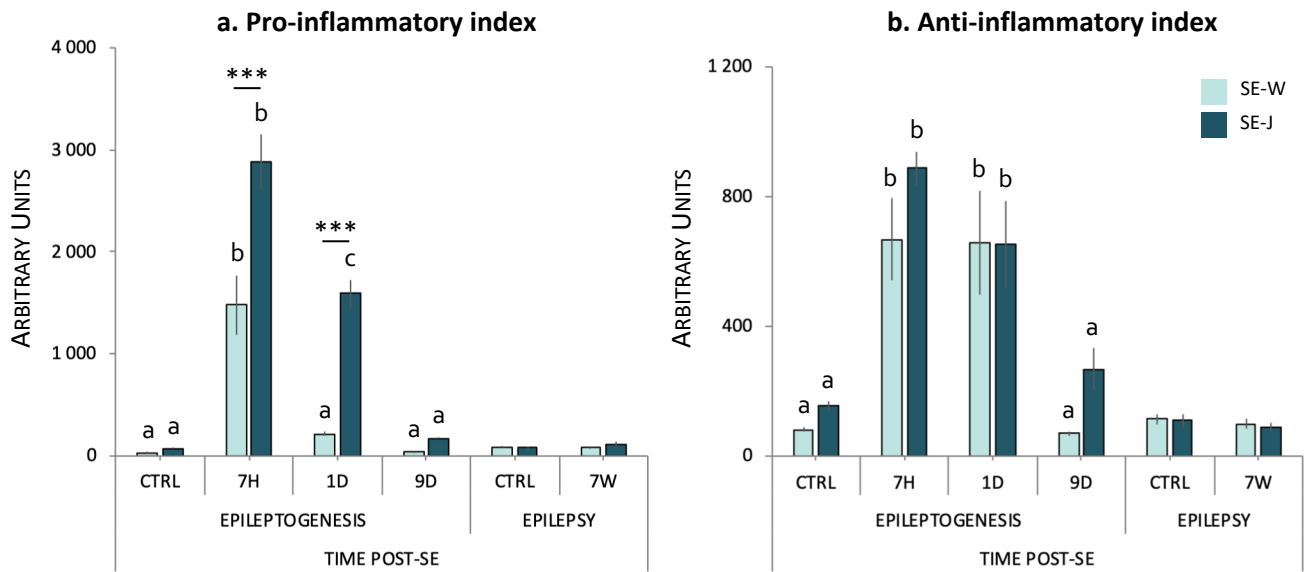

**Fig. 12 Inflammation during epilepsy is of low-grade compared to that during epileptogenesis.** Pro-inflammatory (a) and anti-inflammatory (b) indexes in Sprague-Dawley (SD) rats were calculated during epileptogenesis, i.e. at 7 hours (7H), 1 day (1D), 9 days (9D) post-SE and once epilepsy was chronically installed, i.e. 7 weeks post-SE (7W) compared to respective controls. Results are expressed as in Fig. 5. Bonferroni *post-hoc* analysis following two-way ANOVA: \*\*\*  $p < 0.001$ . Abbreviations: SE-W, SE induced at weaning; SE-J, SE induced at juvenile stage.

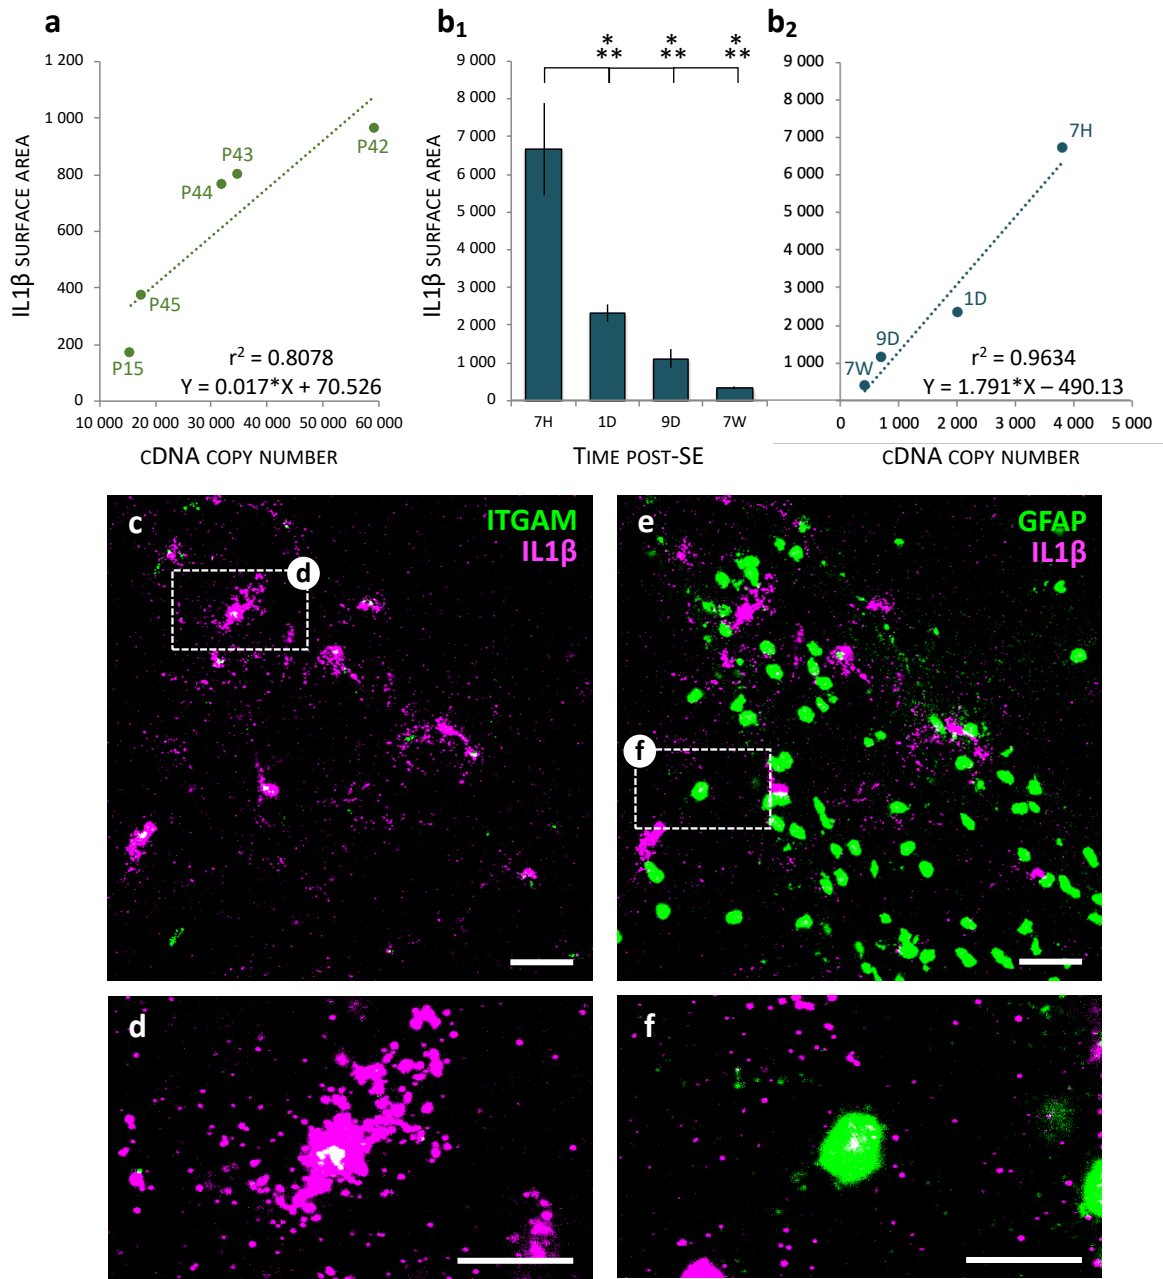

**Fig. 13 RNAscope® ISH of IL1 $\beta$ -mRNA confirms RT-qPCR data and reveals in rats subjected to Pilo-SE that IL1 $\beta$ -mRNA is mainly expressed by microglia at the peak of inflammation.** **a** Scatter plot between IL1 $\beta$  cDNA copy number measured by RT-qPCR in the hippocampus of TLE patients and the surface area occupied by IL1 $\beta$ -transcript signal in sections processed by RNAscope® ISH. Data are obtained from the 5 patients, whose resected hippocampi were split in two parts, one reserved for RT-qPCR, the other one for histology. Data are significantly correlated and fitted by a linear regression,  $p < 0.0381$ . **b** Quantitation of the surface area occupied by IL1 $\beta$ -transcript signal in the granule cell layer of the dentate gyrus of rat brain sections processed by RNAscope® ISH (**b1**). Sections were selected at Bregma -4.16 mm from rats sacrificed during epileptogenesis (7 hours (7H), 1 day (1D), 9D after SE) or during chronic epilepsy (7 weeks (7W) after SE). Statistical analyses showed significant differences between the IL1 $\beta$  surface area measured 7H post SE ( $n=4$ ) and all the other time points (1D:  $n=5$ ; 9D:  $n=3$ ; 7W:  $n=5$ ). Scatter plot (**b2**) between the average IL1 $\beta$  cDNA copy number determined by RT-qPCR in the hippocampus of rats sacrificed at the same time points as in B1 (Fig. 10) and the average surface area occupied by IL1 $\beta$ -transcript signal measured in sections processed by RNAscope® ISH (**b1**). Data are significantly correlated and fitted by a linear regression,  $p < 0.0194$ . (**c-f**) Triple *in situ* hybridization of IL1 $\beta$  together with ITGAM (**c-d**) and GFAP (**e-f**) transcripts using RNAscope® technology, in the dentate gyrus of the rat hippocampus 7 hours (peak of inflammation; Fig. 10) after SE induced at 42 days. To facilitate the visualization of IL1 $\beta$  in microglia and astrocytes, we used two colors providing the best contrasts, and thus assigned magenta to IL1 $\beta$  and green either to ITGAM (microglia) or GFAP (astrocytes). Colocation is displayed in white when magenta and green are superimposed. In this area, the largest amount of IL1 $\beta$  transcript is colocalized with ITGAM+ cells (**c-d**), compared to astrocytes (**e-f**). Confocal microscope images are magnified at 63X. Scale bars: C and E: 50  $\mu$ m; D and F: 25  $\mu$ m.

| ID  | Gender | Age at surgery (years) | Duration of epilepsy (years) | AEDs                | Seizure frequency | MRI                         | Pathology report      |               |                  |
|-----|--------|------------------------|------------------------------|---------------------|-------------------|-----------------------------|-----------------------|---------------|------------------|
|     |        |                        |                              |                     |                   |                             | Hippocampal sclerosis | Neuronal loss | Reactive gliosis |
| P01 | F      | 51                     | 36                           | OXC, URB, VGB       |                   | N                           | no                    | 1             | 1                |
| P03 | F      | 23                     | 22                           | CBZ, TPM            | Several/week      | Right atrophy               | no                    | 0             | 1                |
| P05 | M      | 56                     | 44                           | CLZ, CBZ, PHT, URB, |                   | Left atrophy                | yes                   | 2             | 2                |
| P06 | M      | 27                     | 23                           | CBZ, LTG, PGB       |                   | Left atrophy                | yes                   | 1             | 1                |
| P07 | M      | 36                     | 26                           | CBZ, LTG, URB       | 1/month           | Right atrophy               | yes                   | 3             | 3                |
| P08 | F      | 15                     | 13                           | LEV, OXC            | 2/month           | Left atrophy                | N.A.                  | N.A.          | N.A.             |
| P10 | M      | 42                     | 33                           | CBZ, LEV            |                   | Left atrophy + tumor lesion | yes                   | 2             | 2                |
| P11 | F      | 15                     | 4                            | CBZ                 | 1/month to 2/day  | Right atrophy               | no                    | 1             | 1                |
| P13 | M      | 49                     | 16                           | LCS, LTG, PGB       |                   | Right atrophy               | yes                   | 3             | 3                |
| P14 | F      | 22                     | 21                           | GBP, LTG            |                   | Right atrophy               | yes                   | 3             | 3                |
| P15 | M      | 15                     | 12                           | LCS, LEV            | 2/week            | Right atrophy               | N.A                   | N.A.          | N.A.             |
| P16 | F      | 42                     | 27                           | OXC, ZNS            |                   | Left atrophy                | yes                   | 2             | 2                |
| P17 | F      | 29                     | 21                           | LTG, OXC, PGB, TPM  |                   | Right atrophy               | yes                   | 3             | 3                |
| P18 | M      | 19                     | 8                            | LEV, URB, ZNS       |                   | -                           | no                    | 0             | 0                |
| P19 | F      | 17                     | 9                            | OXC, TPM            |                   | Left atrophy                | yes                   | 1             | 1                |
| P20 | M      | 36                     | 5                            | CBZ, URB, VPA       |                   | N                           | yes                   | 1             | 1                |
| P21 | M      | 26                     | 11                           | LTG                 |                   | Right atrophy               | no                    | 0             | 0                |
| P22 | M      | 19                     | 8                            | LEV                 |                   | Right atrophy               | yes                   | 3             | 3                |
| P25 | M      | 28                     | 8                            | CBZ, URB            |                   | Right atrophy               | yes                   | 3             | 3                |
| P26 | M      | 39                     | 24                           | CBZ, PB, TPM        |                   | Left atrophy                | yes                   | 3             | 3                |
| P27 | F      | 37                     | 35                           | CBZ, LTG, URB       |                   | Left atrophy                | yes                   | 1             | 3                |
| P28 | M      | 50                     | 47                           | CBZ, LCS, LEV, TPM  |                   | Left atrophy                | yes                   | 2             | 3                |
| P29 | F      | 36                     | 27                           | CBZ, LEV, URB       |                   | Left atrophy                | N.A.                  | N.A.          | N.A.             |
| P40 | M      | 14                     | 13                           | CBZ, LCS            |                   | Left atrophy                | yes                   | 3             | 2                |
| P41 | F      | 16                     | 6                            | LEV, TPM            |                   | Right atrophy               | yes                   | 3             | 3                |
| P42 | M      | 21                     | 17                           | CLZ, PHT, TPM       |                   | Left atrophy                | yes                   | 3             | 2                |
| P43 | F      | 26                     | 11                           | LTG                 |                   | bilateral HS                | yes                   | 2             | 2                |
| P44 | F      | 42                     | 39                           | CBZ, LEV, PB        |                   | Left atrophy                | yes                   | 3             | 3                |
| P45 | F      | 36                     | 11                           | CBZ                 |                   | Left atrophy                | yes                   | 3             | 3                |
| P46 | F      | 12                     | 8                            | CBZ                 |                   | Left atrophy                | yes                   | 2             | 2                |
| P47 | M      | 49                     | 31                           | LTG, ZNS            |                   | Left atrophy                | yes                   | 2             | 2                |
| P49 | M      | 35                     | 7                            | CBZ, LEV            |                   | Right atrophy               | yes                   | 3             | 2                |

**Table 1 Clinical characteristics of TLE patients from group 1 (G1: P01-P17), group 2 (G2: P18-P29) and group 3 (G3: P40-P49).** Data not shown in the table were not available in the patients' medical record. Neuronal loss and reactive gliosis scoring: 0: not present; 1: mild; 2: moderate; 3: severe. Abbreviations: N: normal; HS: *hippocampal sclerosis*; AB: amyloid bodies; N.A.: pathology report not available; NL: neuronal loss; O: oedema; RG: reactive gliosis. Anti-epileptic drugs (AEDs): CLZ: clonazepam; CBZ: carbamazepine; GBP: gabapentin; LEV: levetiracetam; LCS: lacosamide; LTG: lamotrigine; OXC: oxcarbazepine; PB: phenobarbital; PHT: phenytoin; PGB: pregabalin; TPM: topiramate; URB: urbanil; VGB: vigabatrin; VPA: valproate; ZNS: zonisamide.

| cDNA copies number in hippocampus of epileptic patients |                         |         |           |           |           |
|---------------------------------------------------------|-------------------------|---------|-----------|-----------|-----------|
|                                                         | Mean $\pm$ SEM          | Min     | Max       | P41       | P49       |
| <b>IL1<math>\beta</math></b>                            | 28 245 $\pm$ 5 388      | 3 474   | 114 957   | 7 833     | 56 674    |
| <b>IL6</b>                                              | 948 $\pm$ 327           | 0       | 5 634     | 75        | 5 634     |
| <b>TNF</b>                                              | 3 727 $\pm$ 1 115       | 0       | 20 485    | 0         | 20 485    |
| <b>MCP1</b>                                             | 201 347 $\pm$ 26 979    | 37 289  | 425 797   | 37 289    | 415 250   |
| <b>MIP1<math>\alpha</math></b>                          | 99 659 $\pm$ 16 512     | 13 683  | 278 864   | 13 683    | 178 990   |
| <b>IL10</b>                                             | 425 $\pm$ 82            | 0       | 1274      | 0         | 1 274     |
| <b>GFAP</b>                                             | 4 274 122 $\pm$ 481 786 | 736 298 | 7 849 435 | 1 190 100 | 7 849 435 |
| <b>ITGAM</b>                                            | 1 661 $\pm$ 279         | 99      | 4 314     | 181       | 4 024     |

**Table 2** Number of cDNA copies (mean  $\pm$  SEM) after reverse transcription in the resected hippocampus of patients with refractory epilepsy (n = 22). P41 and P49 patients have been chosen for exemplification, as they present with the lowest and the highest values of the pro-inflammatory index (Figure 3), respectively.

**Transcript levels in rat hippocampal tissue (percent of CTRL-NaCl)**

|            | <b>IL1<math>\beta</math></b> | <b>IL6</b>             | <b>TNF</b>       | <b>MCP1</b>             | <b>MIP1<math>\alpha</math></b> | <b>ITGAM</b>    |
|------------|------------------------------|------------------------|------------------|-------------------------|--------------------------------|-----------------|
| CTRL-NaCl  | 100 $\pm$ 17                 | 100 $\pm$ 15           | 100 $\pm$ 13     | 100 $\pm$ 55            | 100 $\pm$ 8                    | 100 $\pm$ 8     |
| CTRL-blood | 140 $\pm$ 14                 | 65 $\pm$ 16            | 153 $\pm$ 8      | 70 $\pm$ 8              | 90 $\pm$ 5                     | 99 $\pm$ 6      |
|            | <i>NS</i>                    | <i>NS</i>              | <i>p&lt;0.01</i> | <i>NS</i>               | <i>NS</i>                      | <i>NS</i>       |
| SE-NaCl    | 2 197<br>$\pm$ 794           | 23 720<br>$\pm$ 10 375 | 345<br>$\pm$ 100 | 131 243<br>$\pm$ 23 148 | 1 151<br>$\pm$ 159             | 527<br>$\pm$ 66 |
| SE-blood   | 1 855<br>$\pm$ 757           | 24 127<br>$\pm$ 13 099 | 255<br>$\pm$ 32  | 124 747<br>$\pm$ 19 724 | 885<br>$\pm$ 155               | 617<br>$\pm$ 89 |
|            | <i>NS</i>                    | <i>NS</i>              | <i>NS</i>        | <i>NS</i>               | <i>NS</i>                      | <i>NS</i>       |

**Table 3 Blood cells do not contribute significantly to the inflammatory markers detected in brain.** Transcript level quantitation was performed in the hippocampus of control rats or epileptic rats 7h after SE, after transcardial perfusion of 0.9% NaCl or not. Brains were dissected immediately after death (CTRL-blood: n=5 ; SE-blood: n=5; CTRL-NaCl: n=5 ; SE-NaCl: n=4). NS: statistically not significant.

**Table 4 Fold-changes in inflammatory markers between epileptogenesis and epilepsy in rats**

|                                | SE induced at P21 (weaning stage) |                  |                     |                              | SE induced at P42 (juvenile stage) |                  |                     |                              |                  |
|--------------------------------|-----------------------------------|------------------|---------------------|------------------------------|------------------------------------|------------------|---------------------|------------------------------|------------------|
|                                | Peak epileptogenesis              | Value 7W post-SE | epilepsy 7W post-SE | Fold-difference (Peak vs 7W) | Peak epileptogenesis               | Value 7W post-SE | epilepsy 7W post-SE | Fold-difference (Peak vs 7W) | p value (t-test) |
| Molecular markers              |                                   |                  |                     |                              |                                    |                  |                     |                              |                  |
| <b>IL1<math>\beta</math></b>   | 5 849                             | 232              | 25                  | 0.0075                       | 3 812                              | 415              | 9                   | 0.0148                       | *                |
| <b>IL6</b>                     | 2 480                             | 0                | -                   | 0.0360                       | 21 797                             | 0                | -                   | 0.0004                       | ***              |
| <b>TNF<math>\alpha</math></b>  | 75                                | 34               | 0.46                | 0.0309                       | 337                                | 42               | 8                   | <0.0001                      | ***              |
| <b>IFN<math>\gamma</math></b>  | 57                                | 8                | 7                   | 0.0318                       | 61                                 | 5                | 12                  | <0.0001                      | ***              |
| <b>MCP1</b>                    | 1 488 688                         | 2 012            | 740                 | 0.0001                       | 2 774 798                          | 3 554            | 781                 | <0.0001                      | ***              |
| <b>MIP1<math>\alpha</math></b> | 403 597                           | 3 552            | 114                 | 0.0020                       | 685 572                            | 11 097           | 62                  | 0.0011                       | **               |
| Index                          |                                   |                  |                     |                              |                                    |                  |                     |                              |                  |
| <b>Pro-inflammatory</b>        | 1 480                             | 83               | 17.77               | 0.0029                       | 2 877                              | 120              | 23.95               | 0.0001                       | ***              |

For each molecular marker included in the pro-inflammatory index (i.e IL1 $\beta$ , IL6, TNF, IGNY, MCP1, MIP1 $\alpha$ ), the highest value of cDNA copy number measured during the epileptogenesis phase was compared to the value measured during the chronic phase of epilepsy (7 weeks post-SE) in rats whose SE was induced at P21 or at P42. Fold-difference between epileptogenesis and epilepsy was calculated. Statistical difference was determined with Student's t-test: \*  $p < 0.05$ , \*\*  $p < 0.01$ , \*\*\*  $p < 0.001$ .
